# Supplementary material for: Postmortem genetic screening for the identification, verification, and reporting of genetic variants contributing to the sudden death of the young
Source: HighWire-hosted journal article supplement (doi:10.1101/gr.195800.115), 2016-07-19
Supplement: Supplemental_Table__S1.doc.docx [file Supplemental_Table__S1.doc.docx]

**Supplemental Table 1. Targeted Genes – Disease Associations.**

aMIM numbers shown in parenthesis for each gene

bBased on disease associations referenced in OMIM and/or ClinVar.

Abbreviations are as follows: AF, Atrial fibrillation; ARVC, Arrhythmogenic right ventricular cardiomyopathy; BRs, Brugada syndrome; CPVT, Catecholaminergic polymorphic ventricular tachycardia; DC, Dilated cardiomyopathy; HCM, Hypertrophic cardiomyopathy; LQTS, Long QT syndrome; MCAD, Medium-chain acyl-CoA dehydrogenase deficiency ; PFHB1A, Progressive familial heart block type IA; SD, Sudden death; SIDS, Sudden infant death syndrome; SUDEP, Sudden unexpected death in epilepsy; VF, Ventricular fibrillation

**Supplemental Table 1.** Targeted Genes – Disease Associations

| Genea | Protein Name | Disease Associationb |
| --- | --- | --- |
| *ACADM* (607008) | Acyl-Coenzyme A dehydrogenase, medium-chain | MCAD Deficiency ; SIDS |
| *ACTC1* (102540) | Actin, alpha, cardiac muscle 1 | DC; HCM |
| *AKAP9* (604001) | A Kinase (PRKA) anchor protein 9 | LQTS |
| *ALG10* (603313) | Alpha-1,2-glucosyltransferase | LQTS |
| *ANK2* (106410) | Ankyrin 2 | LQTS |
| *ANKRD1* (609599) | Ankyrin repeat domain 1, cardiac | DC; HCM |
| *CACNA1C* (114205) | Calcium channel, voltage-dependent, L type, alpha 1C subunit | BRs; LQTS |
| *CACNB2* (600003) | Calcium channel, voltage-dependent, beta 2 subunit | BRs |
| *CASQ2* (114251) | Calsequestrin 2, cardiac | CPVT |
| *CAV3* (601253) | Caveolin 3 | DC; HCM; LQTS; SIDS |
| *DSC2* (125645) | Desmocollin 2 | ARVC |
| *DSG2* (125671) | Desmoglein 2 | ARVC |
| *DSP* (125647) | Desmoplakin (DPI,DPII) | ARVC |
| *FXN* (606829 | Frataxin | Friedreich Ataxia; HCM |
| *GLA* (300644) | Alpha-Galactosidase | Fabry Disease ; HCM; SCD |
| *GPD1L* (611778) | Glycerol-3-phosphate dehydrogenase 1-like | BRs |
| *IL10* (124092) | Interleukin 10 | SIDS; Broad spectrum of diseases |
| *IL1A* (147760) | Interleukin 1, alpha | SIDS; Broad spectrum of diseases |
| *IL1B* (147720) | Interleukin 1, beta | SIDS; Broad spectrum of diseases |
| *IL6* (147620) | Interleukin 6 | SIDS; Broad spectrum of diseases |
| *JPH2* (605267) | Junctophilin 2 | HCM |
| *JUP* (173325) | Junction plakoglobin | ARVC |
| *KCNA1* (176260) | Potassium voltage-gated channel, shaker-related subfamily, member 1 | SUDEP; Episodic ataxia |
| *KCNE1* (176261) | Potassium voltage gated channel, Isk related family, member 1 | LQTS |
| *KCNE2* (603796) | Potassium voltage-gated channel, Isk-related family, member 2 | LQTS; AF |
| *KCNE3* (604433) | Potassium voltage-gated channel, Isk-related family, member 3 | BRs |
| *KCNH2* (152427) | Potassium voltage-gated channel, subfamily H, member 2 | LQTS |
| *KCNJ2* (600681) | Potassium inwardly-rectifying channel, subfamily J, member 2 | SQTS, AF |
| *KCNQ1* (607542) | Potassium voltage gated channel, KQT-like subfamily, member 1 | LQTS, SQTS, AF |
| *KCNQ2* (602235) | Potassium voltage-gated channel, KQT-like subfamily, member 2 | Seizures; Epilepsy |
| *KCNQ3* (602232) | Potassium voltage-gated channel, KQT-like subfamily, member 3 | Seizures; Epilepsy |
| *LAMP2* (309060) | Lysosome-associated membrane protein 2 | Danon disease; SD; HCM |
| *LDB3* (605906) | LIM domain binding 3 | DC |
| *LMNA* (150330) | Lamin A/C | DC; SCD; Lipodystrophy; Peripheral Neuropathy |
| *MYBPC3* (600958) | Myosin binding protein C, cardiac | HCM; DC |
| *MYH7* (160760) | Myosin, heavy chain 7, cardiac muscle, beta | HCM; DC |
| *MYH7B* (609928) | Myosin, heavy polypeptide 7B, cardiac muscle, beta | HCM |
| *MYL2* (160781) | Myosin, light chain 2, regulatory, cardiac, slow | HCM |
| *MYL3* (160790) | Myosin, light chain 3, alkali; ventricular, skeletal, slow | HCM |
| *NOS1AP* (605551) | Nictric oxide synthase 1 adapter protein | LQTS |
| *PKP2* (602861) | Plakophilin 2 | ARVC |
| *PLN* (172405) | Phospholamban | DC; HCM |
| *PRKAG2* (602743) | Protein kinase, AMP-activated, gamma 2 non-catalytic subunit | HCM; AF; Glycogen Storage Disease of Heart; Wolff-Parkinson-White Syndrome |
| *PYGM* (608455) | Phosphorylase, glycogen, muscle | McArdle Disease; SIDS |
| *RAF1* (164760) | RAF-1 proto-oncogene serine/threonine protein kinase | Noonan Syndrome 5; Leopard Syndrome 2, HCM |
| *RYR2* (180902) | Ryanodine receptor 2 | ARVC; CPVT; VT; SIDS; SD |
| *SCN10A* (604427) | Sodium channel, voltage-gated, type X, alpha subunit | BRs |
| *SCN1B* (600235) | Sodium channel, voltage-gated, type 1, beta subunit | BRs |
| *SCN2A* (182390) | Sodium channel, voltage-gated, type II, alpha subunit | Seizures; Epilepsy |
| *SCN3B* (608214) | Sodium channel, voltage-gated, type III, beta | BRs; AF |
| *SCN4B* (608256) | Sodium channel, voltage-gated, type IV, beta | LQTS; AF |
| *SCN5A* (600163) | Sodium channel, voltage gated, type V, alpha subunit | LQTS; BRs; DC; AF; VF; SIDS; PFHB1A |
| *SLC37A4* (602671) | Solute carrier family 37 (glucose-6-phosphate transporter), member 4 | Glycogen Storage Disease, SD |
| *SLC6A4* (182138) | Solute carrier family 6 (serotonin transporter), member 4 | SIDS |
| *SNTA1* (601017) | Syntrophin, alpha 1 | LQTS |
| *TCAP* (604488) | Titin-cap (telethonin) | DC |
| *TGFB3* (190230) | Transforming growth factor, beta 3 | ARVC |
| *TMEM43* (612048) | Transmembrane protein 43 | ARVC |
| *TNF* (191160) | Tumor necrosis factor alpha | SIDS; Broad spectrum of diseases |
| *TNNC1* (191040) | Troponin C, slow | DC; HCM |
| *TNNI3* (191044) | Troponin I, cardiac | DC; HCM |
| *TNNT2* (191045) | Troponin T2, cardiac | DC; HCM |
| *TPM1* (191010) | Tropomyosin 1 | DC; HCM |
| *VCL* (193065) | Vinculin | DC; HCM |
