# Supplementary material for: Postmortem genetic screening for the identification, verification, and reporting of genetic variants contributing to the sudden death of the young
Source: HighWire-hosted journal article supplement (doi:10.1101/gr.195800.115), 2016-07-19
Supplement: Supplemental_Table__S2.doc.docx [file Supplemental_Table__S2.doc.docx]

**Supplemental Table 2. Exonic Non-Synonymous Variants.**

Non-synonymous variants observed prior to clinical review. Variants with conflicting, minimal or no literature support, those identified in single individuals, or variants of unknown significance are not shown. Highlighted variants are confirmed pathogenic variants. Note most variants were observed in multiple cases. **A.** Infants (0-12 months) **B**. Children / young adults (1-40 years)

**Supplemental Table 2. A.** Infants (0-12 months)

| **Case** | **Age** | | **Cause** | **CHR** | **REF** | **ALT** | **Genotype** | **Gene** | **NM** | **Base Sub.** | **AA sub.** | **RS#** |
| --- | --- | --- | --- | --- | --- | --- | --- | --- | --- | --- | --- | --- |
| 1 | 1 | Months | Undetermined (Co-sleeping) | 11 | C | T | Heterozygous | *SCN3B* | 18400 | G328A | V110I | rs147205617 |
| 1 | 1 | Months | Undetermined (Co-sleeping) | 3 | T | C | Heterozygous | *SCN5A* | 1160161 | A1673G | H558R | rs1805124 |
| 1 | 1 | Months | Undetermined (Co-sleeping) | 3 | G | A | Heterozygous | *SCN5A* | 1160161 | C1852T | L618F | rs45488304 |
| 1 | 1 | Months | Undetermined (Co-sleeping) | 3 | A | G | Homozygous | *SCN10A* | 6514 | T3218C | V1073A | rs6795970 |
| 2 | 2 | Months | Undetermined (Co-sleeping) | 4 | C | T | Heterozygous | *ANK2* | 20977 | C5461T | R1821W (R1788W) | rs121912706 |
| 2 | 2 | Months | Undetermined (Co-sleeping) | 3 | T | C | Heterozygous | *SCN5A* | 1160161 | A1673G | H558R | rs1805124 |
| 2 | 2 | Months | Undetermined (Co-sleeping) | 21 | T | C | Heterozygous | *KCNE1* | 219 | A112G | S38G | rs1805127 |
| 2 | 2 | Months | Undetermined (Co-sleeping) | 3 | G | A | Heterozygous | *SCN5A* | 198056 | C647T | S216L | rs41276525 |
| 2 | 2 | Months | Undetermined (Co-sleeping) | 3 | A | G | Homozygous | *SCN10A* | 6514 | T3218C | V1073A | rs6795970 |
| 3 | 3 | Months | Undetermined | 3 | C | T | Heterozygous | *SCN5A* | 198056 | G1844A | G615E | rs12720452 |
| 3 | 3 | Months | Undetermined | 3 | T | C | Heterozygous | *SCN5A* | 1160160 | A1673G | H558R | rs1805124 |
| 3 | 3 | Months | Undetermined | 3 | A | G | Heterozygous | *SCN10A* | 6514 | T3218C | V1073A | rs6795970 |
| 4 | 3 | Months | SIDS | 7 | T | G | Homozygous | *KCNH2* | 172057 | A1670C | K557T | rs1805123 |
| 4 | 3 | Months | SIDS | 3 | T | C | Heterozygous | *SCN5A* | 1160161 | A1673G | H558R | rs1805124 |
| 4 | 3 | Months | SIDS | 12 | G | T | Heterozygous | *MYL2* | 432 | C141A | N47K | rs199474808 |
| 4 | 3 | Months | SIDS | 3 | A | G | Homozygous | *SCN10A* | 6514 | T3218C | V1073A | rs6795970 |
| 5 | 5 | Months | SIDS | 10 | C | T | Heterozygous | *VCL* | 14000 | C2801T | A934V | rs16931179 |
| 5 | 5 | Months | SIDS | 7 | T | G | Heterozygous | *KCNH2* | 172057 | A1670C | K557T | rs1805123 |
| 5 | 5 | Months | SIDS | 3 | T | C | Heterozygous | *SCN5A* | 1160160 | A1673G | H558R | rs1805124 |
| 5 | 5 | Months | SIDS | 21 | T | C | Homozygous | *KCNE1* | 219 | A112G | S38G | rs1805127 |
| 5 | 5 | Months | SIDS | 3 | C | T | Heterozygous | *SCN5A* | 1160160 | G80A | R27H | rs199473045 |
| 5 | 5 | Months | SIDS | 3 | A | G | Homozygous | *SCN10A* | 6514 | T3218C | V1073A | rs6795970 |
| 6 | 5 | Months | SIDS | 7 | T | G | Homozygous | *KCNH2* | 172057 | A1670C | K557T | rs1805123 |
| 6 | 5 | Months | SIDS | 3 | T | C | Heterozygous | *SCN5A* | 1160161 | A1673G | H558R | rs1805124 |
| 6 | 5 | Months | SIDS | 1 | C | T | Heterozygous | *RYR2* | 1035 | C3320T | T1107M | rs200236750 |
| 7 | 5 | Months | SIDS | 3 | G | A | Heterozygous | *SCN5A* | 1160161 | C5549T | S1904L | rs150264233 |
| 7 | 5 | Months | SIDS | 21 | T | C | Homozygous | *KCNE1* | 219 | A112G | S38G | rs1805127 |
| 7 | 5 | Months | SIDS | 3 | A | G | Homozygous | *SCN10A* | 6514 | T3218C | V1073A | rs6795970 |
| 8 | 6 | Months | Undetermined | 3 | T | C | Heterozygous | *SCN5A* | 1160161 | A1673G | H558R | rs1805124 |
| 8 | 6 | Months | Undetermined | 21 | T | C | Homozygous | *KCNE1* | 219 | A112G | S38G | rs1805127 |
| 8 | 6 | Months | Undetermined | 3 | A | G | Heterozygous | *SCN10A* | 6514 | T3218C | V1073A | rs6795970 |
| 8 | 6 | Months | Undetermined | 3 | C | T | Heterozygous | *GPD1L* | 15141 | C839T | A280V | rs72552291 |
| 8 | 6 | Months | Undetermined | 11 | G | C | Heterozygous | *MYBPC3* | 256 | C2993G | Q998E | rs11570112 |
| 14 | 5 | Months | SIDS | 3 | T | C | Heterozygous | *SCN5A* | 1160161 | A1673G | H558R | rs1805124 |
| 14 | 5 | Months | SIDS | 21 | T | C | Heterozygous | *KCNE1* | 219 | A112G | S38G | rs1805127 |
| 14 | 5 | Months | SIDS | 3 | A | G | Homozygous | *SCN10A* | 6514 | T3218C | V1073A | rs6795970 |
| 14 | 5 | Months | SIDS | 3 | C | T | Heterozygous | *CAV3* | 1234 | C233T | T78M | rs72546668 |
| 17 | 25 | Days | Undetermined | 1 | G | A |  | *RYR2* | 1035 | G5656A | G1886S | rs3766871 |
| 17 | 25 | Days | Undetermined | 10 | G | A | Heterozygous | *LDB3* | 1080114 | G349A | D117N | rs121908338 |
| 17 | 25 | Days | Undetermined | 3 | T | C | Heterozygous | *SCN5A* | 1160160 | A1673G | H558R | rs1805124 |
| 17 | 25 | Days | Undetermined | 21 | T | C | Heterozygous | *KCNE1* | 219 | A112G | S38G | rs1805127 |
| 17 | 25 | Days | Undetermined | 3 | A | G | Homozygous | *SCN10A* | 6514 | T3218C | V1073A | rs6795970 |
| 19 | 5 | Months | Undetermined | 3 | T | C | Heterozygous | *SCN5A* | 1160160 | A1673G | H558R | rs1805124 |
| 19 | 5 | Months | Undetermined | 21 | T | C | Heterozygous | *KCNE1* | 219 | A112G | S38G | rs1805127 |
| 19 | 5 | Months | Undetermined | 11 | C | T | Heterozygous | *MYBPC3* | 256 | G2687A | V896M | rs35078470 |
| 19 | 5 | Months | Undetermined | 3 | A | G | Homozygous | *SCN10A* | 6514 | T3218C | V1073A | rs6795970 |
| 20 | 1 | Months | Undetermined | 1 | G | A |  | *RYR2* | 1035 | G5656A | G1886S | rs3766871 |
| 20 | 1 | Months | Undetermined | 21 | T | C | Homozygous | *KCNE1* | 219 | A112G | S38G | rs1805127 |
| 20 | 1 | Months | Undetermined | 11 | G | A | Heterozygous | *MYBPC3* | 256 | C2499T | A833V | RS3729952 |
| 20 | 1 | Months | Undetermined | 3 | A | G | Homozygous | *SCN10A* | 6514 | T3218C | V1073A | rs6795970 |
| 22 | 6 | Months | Undetermined | 21 | T | C | Homozygous | *KCNE1* | 219 | A112G | S38G | rs1805127 |
| 22 | 6 | Months | Undetermined | 3 | A | G | Homozygous | *SCN10A* | 6514 | T3218C | V1073A | rs6795970 |
| 24 | 1 | Months | Undetermined | 7 | T | G | Heterozygous | *KCNH2* | 172057 | A1670C | K557T | rs1805123 |
| 24 | 1 | Months | Undetermined | 3 | A | G | Homozygous | *SCN10A* | 6514 | T3218C | V1073A | rs6795970 |
| 27 | 5 | Months | Undetermined (Co-sleeping) | 6 | C | G | Heterozygous | *DSP* | 4415 | C6881G | A2294G | rs147000526 |
| 27 | 5 | Months | Undetermined (Co-sleeping) | 21 | T | C | Heterozygous | *KCNE1* | 219 | A112G | S38G | rs1805127 |
| 27 | 5 | Months | Undetermined (Co-sleeping) | 3 | A | G | Homozygous | *SCN10A* | 6514 | T3218C | V1073A | rs6795970 |
| 29 | 4 | Months | Undetermined | 6 | G | A | Heterozygous | *DSP* | 4415 | G5218A | E1740K | rs142885240 |
| 29 | 4 | Months | Undetermined | 21 | T | C | Homozygous | *KCNE1* | 219 | A112G | S38G | rs1805127 |
| 29 | 4 | Months | Undetermined | 3 | A | G | Homozygous | *SCN10A* | 6514 | T3218C | V1073A | rs6795970 |
| 30 | 29 | Days | SIDS | 21 | T | C | Homozygous | *KCNE1* | 219 | A112G | S38G | rs1805127 |
| 30 | 30 | Days | SIDS | 4 | C | A | Heterozygous | *ANK2* | 1148 | C11218A | L3740I (L1622I) | rs35530544 |
| 30 | 31 | Days | SIDS | 3 | A | G | Heterozygous | *SCN10A* | 6514 | T3218C | V1073A | rs6795970 |
| 30 | 32 | Days | SIDS | 3 | G | T | Heterozygous | *SCN5A* | 198056 | C3308A | S1103Y | rs7626962 |
| 34 | 1 | Months | Undetermined | 3 | T | C | Heterozygous | *SCN5A* | 198056 | A1673G | H558R | rs1805124 |
| 34 | 1 | Months | Undetermined | 21 | T | C | Heterozygous | *KCNE1* | 219 | A112G | S38G | rs1805127 |
| 34 | 1 | Months | Undetermined | 3 | A | G | Homozygous | *SCN10A* | 6514 | T3218C | V1073A | rs6795970 |
| 36 | 3 | Months | Undetermined | 10 | A | G | Heterozygous | *LDB3* | 7078 | A752G | K251R | rs34423165 |
| 36 | 3 | Months | Undetermined | 3 | A | G | Homozygous | *SCN10A* | 6514 | T3218C | V1073A | rs6795970 |
| 36 | 3 | Months | Undetermined | 3 | G | T | Heterozygous | *SCN5A* | 198056 | C3308A | S1103Y | rs7626962 |
| 37 | 6 | Months | Undetermined | 21 | T | C | Homozygous | *KCNE1* | 219 | A112G | S38G | rs1805127 |
| 37 | 6 | Months | Undetermined | 3 | A | G | Homozygous | *SCN10A* | 6514 | T3218C | V1073A | rs6795970 |
| 43 | 3 | Months | SIDS | 7 | T | G | Heterozygous | *KCNH2* | 172057 | A1670C | K557T | rs1805123 |
| 43 | 3 | Months | SIDS | 21 | T | C | Heterozygous | *KCNE1* | 219 | A112G | S38G | rs1805127 |
| 43 | 3 | Months | SIDS | 3 | A | G | Heterozygous | *SCN10A* | 6514 | T3218C | V1073A | rs6795970 |
| 44 | 1 | Months | Undetermined (Co-sleeping) | 1 | G | A |  | *RYR2* | 1035 | G5656A | G1886S | rs3766871 |
| 44 | 1 | Months | Undetermined (Co-sleeping) | 7 | T | G | Heterozygous | *KCNH2* | 172057 | A1670C | K557T | rs1805123 |
| 44 | 1 | Months | Undetermined (Co-sleeping) | 21 | T | C | Homozygous | *KCNE1* | 219 | A112G | S38G | rs1805127 |
| 44 | 1 | Months | Undetermined (Co-sleeping) | 3 | A | G | Homozygous | *SCN10A* | 6514 | T3218C | V1073A | rs6795970 |
| 45 | 1 | Months | Undetermined | 3 | T | C | Heterozygous | *SCN5A* | 1160160 | A1673G | H558R | rs1805124 |
| 45 | 1 | Months | Undetermined | 21 | T | C | Heterozygous | *KCNE1* | 219 | A112G | S38G | rs1805127 |
| 45 | 1 | Months | Undetermined | 11 | G | C | Heterozygous | *MYBPC3* | 256 | C2871G | T957S | rs193922380 |
| 45 | 1 | Months | Undetermined | 1 | G | A | Heterozygous | *RYR2* | 1035 | G5654A | G1885E | rs41315858 |
| 45 | 1 | Months | Undetermined | 3 | A | G | Heterozygous | *SCN10A* | 6514 | T3218C | V1073A | rs6795970 |
| 46 | 3 | Months | Undetermined | 21 | T | C | Homozygous | *KCNE1* | 219 | A112G | S38G | rs1805127 |
| 46 | 3 | Months | Undetermined | 3 | A | G | Heterozygous | *SCN10A* | 6514 | T3218C | V1073A | rs6795970 |
| 47 | 2 | Months | SIDS | 3 | C | T | Heterozygous | *MYL3* | 258 | G427A | E143K | rs104893750 |
| 47 | 2 | Months | SIDS | 3 | T | C | Heterozygous | *SCN5A* | 1160160 | A1673G | H558R | rs1805124 |
| 47 | 2 | Months | SIDS | 21 | T | C | Homozygous | *KCNE1* | 219 | A112G | S38G | rs1805127 |
| 47 | 2 | Months | SIDS | 21 | C | T | Heterozygous | *KCNE1* | 219 | G253A | D85N | rs1805128 |
| 47 | 2 | Months | SIDS | 3 | A | G | Heterozygous | *SCN10A* | 6514 | T3218C | V1073A | rs6795970 |
| 48 | 4 | Months | SIDS | 7 | T | G | Heterozygous | *KCNH2* | 172057 | A1670C | K557T | rs1805123 |
| 48 | 4 | Months | SIDS | 3 | T | C | Heterozygous | *SCN5A* | 1160160 | A1673G | H558R | rs1805124 |
| 48 | 4 | Months | SIDS | 21 | T | C | Heterozygous | *KCNE1* | 219 | A112G | S38G | rs1805127 |
| 48 | 4 | Months | SIDS | 3 | A | G | Homozygous | *SCN10A* | 6514 | T3218C | V1073A | rs6795970 |
| 48 | 4 | Months | SIDS | 1 | G | A | Heterozygous | *ACADM* | 16 | G928A | G310R |  |
| 49 | 2 | Months | SIDS | 7 | T | G | homozygous | *KCNH2* | 172057 | A1670C | K557T | rs1805123 |
| 49 | 2 | Months | SIDS | 21 | T | C | Homozygous | *KCNE1* | 219 | A112G | S38G | rs1805127 |
| 49 | 2 | Months | SIDS | 1 | G | A | Heterozygous | *RYR2* | 1035 | G5654A | G1885E | rs41315858 |
| 49 | 2 | Months | SIDS | 3 | A | G | Heterozygous | *SCN10A* | 6514 | T3218C | V1073A | rs6795970 |
| 49 | 2 | Months | SIDS | 1 | A | G | Heterozygous | *ACADM* | 16 | A985G | K329E | rs77931234 |
| 49 | 2 | Months | SIDS | 14 | T | C | Heterozygous | *MYH6* | 2471 | A1628G | K543R |  |
| 50 | 1 | Months | Undetermined (Co-sleeping) | 21 | T | C | Heterozygous | *KCNE1* | 219 | A112G | S38G | rs1805127 |
| 50 | 1 | Months | Undetermined (Co-sleeping) | 3 | C | A | Heterozygous | *SCN5A* | 198056 | G5851T | V1951L | rs41315493 |
| 50 | 1 | Months | Undetermined (Co-sleeping) | 3 | A | G | Heterozygous | *SCN10A* | 6514 | T3218C | V1073A | rs6795970 |
| 51 | 1 | Months | Undetermined (Co-sleeping) | 21 | C | G | Heterozygous | *KCNE2* | 172201 | C25G | Q9E | rs16991652 |
| 51 | 1 | Months | Undetermined (Co-sleeping) | 3 | T | C | Heterozygous | *SCN5A* | 1160160 | A1673G | H558R | rs1805124 |
| 51 | 1 | Months | Undetermined (Co-sleeping) | 21 | T | C | Heterozygous | *KCNE1* | 219 | A112G | S38G | rs1805127 |
| 51 | 1 | Months | Undetermined (Co-sleeping) | 3 | A | G | Homozygous | *SCN10A* | 6514 | T3218C | V1073A | rs6795970 |
| 52 | 2 | Months | SIDS | 7 | T | G | Heterozygous | *KCNH2* | 172057 | A1670C | K557T | rs1805123 |
| 52 | 2 | Months | SIDS | 21 | T | C | Homozygous | *KCNE1* | 219 | A112G | S38G | rs1805127 |
| 53 | 7 | Months | Undetermined (Co-sleeping) | 7 | T | G | Homozygous | *KCNH2* | 172057 | A1670C | K557T | rs1805123 |
| 53 | 7 | Months | Undetermined (Co-sleeping) | 21 | T | C | Heterozygous | *KCNE1* | 219 | A112G | S38G | rs1805127 |
| 53 | 7 | Months | Undetermined (Co-sleeping) | 3 | A | G | Homozygous | *SCN10A* | 6514 | T3218C | V1073A | rs6795970 |
| 54 | 3 | Months | SIDS | 1 | G | A |  | *RYR2* | 1035 | G5656A | G1886S | rs3766871 |
| 54 | 3 | Months | SIDS | 3 | T | C | Heterozygous | *SCN5A* | 1160160 | A1673G | H558R | rs1805124 |
| 54 | 3 | Months | SIDS | 21 | T | C | Heterozygous | *KCNE1* | 219 | A112G | S38G | rs1805127 |
| 54 | 3 | Months | SIDS | 3 | A | G | Homozygous | *SCN10A* | 6514 | T3218C | V1073A | rs6795970 |
| 55 | 2 | Months | Undetermined (Co-sleeping) | 21 | T | C | Homozygous | *KCNE1* | 219 | A112G | S38G | rs1805127 |
| 55 | 2 | Months | Undetermined (Co-sleeping) | 3 | A | G | Homozygous | *SCN10A* | 6514 | T3218C | V1073A | rs6795970 |
| 56 | 3 | Months | Undetermined (Co-sleeping) | 1 | G | A |  | *RYR2* | 1035 | G5656A | G1886S | rs3766871 |
| 56 | 3 | Months | Undetermined (Co-sleeping) | 3 | T | C | Heterozygous | *SCN5A* | 1160160 | A1673G | H558R | rs1805124 |
| 56 | 3 | Months | Undetermined (Co-sleeping) | 21 | T | C | Homozygous | *KCNE1* | 219 | A112G | S38G | rs1805127 |
| 56 | 3 | Months | Undetermined (Co-sleeping) | 3 | A | G | Homozygous | *SCN10A* | 6514 | T3218C | V1073A | rs6795970 |
| 57 | 1 | Months | Undetermined (Co-sleeping) | 21 | T | C | Homozygous | *KCNE1* | 219 | A112G | S38G | rs1805127 |
| 57 | 1 | Months | Undetermined (Co-sleeping) | 3 | A | G | Homozygous | *SCN10A* | 6514 | T3218C | V1073A | rs6795970 |
| 58 | 1 | Months | SIDS | 7 | T | G | Heterozygous | *KCNH2* | 172057 | A1670C | K557T | rs1805123 |
| 58 | 1 | Months | SIDS | 3 | T | C | Heterozygous | *SCN5A* | 1160160 | A1673G | H558R | rs1805124 |
| 58 | 1 | Months | SIDS | 21 | T | C | Homozygous | *KCNE1* | 219 | A112G | S38G | rs1805127 |
| 58 | 1 | Months | SIDS | 3 | A | G | Homozygous | *SCN10A* | 6514 | T3218C | V1073A | rs6795970 |
| 59 | 1 | Months | SIDS | 21 | T | C | Heterozygous | *KCNE1* | 219 | A112G | S38G | rs1805127 |
| 59 | 1 | Months | SIDS | 3 | A | G | Homozygous | *SCN10A* | 6514 | T3218C | V1073A | rs6795970 |
| 60 | 2 | Months | Undetermined (Co-sleeping) | 21 | T | C | Heterozygous | *KCNE1* | 219 | A112G | S38G | rs1805127 |
| 60 | 2 | Months | Undetermined (Co-sleeping) | 4 | C | A | Heterozygous | *ANK2* | 1148 | C11218A | L3740I (L1622I) | rs35530544 |
| 60 | 2 | Months | Undetermined (Co-sleeping) | 3 | A | G | Homozygous | *SCN10A* | 6514 | T3218C | V1073A | rs6795970 |
| 60 | 2 | Months | Undetermined (Co-sleeping) | 3 | G | T | Heterozygous | *SCN5A* | 198056 | C3308A | S1103Y | rs7626962 |
| 62 | 2 | Months | SIDS | 21 | T | C | Homozygous | *KCNE1* | 219 | A112G | S38G | rs1805127 |
| 62 | 2 | Months | SIDS | 6 | C | G | Heterozygous | *DSP* | 4415 | C4372G | R1458G | rs28763965 |
| 62 | 2 | Months | SIDS | 3 | A | G | Heterozygous | *SCN10A* | 6514 | T3218C | V1073A | rs6795970 |
| 63 | 3 | Months | SIDS | 3 | A | G | Heterozygous | *SCN10A* | 6514 | T3218C | V1073A | rs6795970 |
| 64 | 3 | Months | Undetermined (Co-sleeping) | 1 | G | A |  | *RYR2* | 1035 | G5656A | G1886S | rs3766871 |
| 64 | 3 | Months | Undetermined (Co-sleeping) | 3 | T | C | Heterozygous | *SCN5A* | 1160160 | A1673G | H558R | rs1805124 |
| 64 | 3 | Months | Undetermined (Co-sleeping) | 21 | T | C | Heterozygous | *KCNE1* | 219 | A112G | S38G | rs1805127 |
| 64 | 3 | Months | Undetermined (Co-sleeping) | 11 | G | A | Heterozygous | *MYBPC3* | 256 | C2499T | A833V | RS3729952 |
| 64 | 3 | Months | Undetermined (Co-sleeping) | 3 | A | G | Homozygous | *SCN10A* | 6514 | T3218C | V1073A | rs6795970 |
| 65 | 6 | Days | Undetermined | 1 | G | A |  | *RYR2* | 1035 | G5656A | G1886S | rs3766871 |
| 65 | 6 | Days | Undetermined | 3 | T | C | Heterozygous | *SCN5A* | 1160160 | A1673G | H558R | rs1805124 |
| 65 | 6 | Days | Undetermined | 21 | T | C | Heterozygous | *KCNE1* | 219 | A112G | S38G | rs1805127 |
| 65 | 6 | Days | Undetermined | 3 | A | G | Homozygous | *SCN10A* | 6514 | T3218C | V1073A | rs6795970 |
| 66 | 2 | Months | SIDS | 3 | T | C | Heterozygous | *SCN5A* | 1160160 | A1673G | H558R | rs1805124 |
| 66 | 2 | Months | SIDS | 21 | T | C | Homozygous | *KCNE1* | 219 | A112G | S38G | rs1805127 |
| 66 | 2 | Months | SIDS | 10 | A | G | Heterozygous | *LDB3* | 7078 | A752G | K251R | rs34423165 |
| 66 | 2 | Months | SIDS | 3 | A | G | Homozygous | *SCN10A* | 6514 | T3218C | V1073A | rs6795970 |
| 67 | 2 | Months | Undetermined (Co-sleeping) | 3 | T | C | Heterozygous | *SCN5A* | 1160160 | A1673G | H558R | rs1805124 |
| 67 | 2 | Months | Undetermined (Co-sleeping) | 21 | T | C | Heterozygous | *KCNE1* | 219 | A112G | S38G | rs1805127 |
| 67 | 2 | Months | Undetermined (Co-sleeping) | 3 | A | G | Homozygous | *SCN10A* | 6514 | T3218C | V1073A | rs6795970 |
| 68 | 8 | Weeks | Undetermined | 3 | T | C | Heterozygous | *SCN5A* | 1160160 | A1673G | H558R | rs1805124 |
| 68 | 8 | Weeks | Undetermined | 21 | T | C | Heterozygous | *KCNE1* | 219 | A112G | S38G | rs1805127 |
| 68 | 8 | Weeks | Undetermined | 3 | A | G | Homozygous | *SCN10A* | 6514 | T3218C | V1073A | rs6795970 |
| 69 | 24 | Days | Undetermined (Co-sleeping) | 21 | T | C | Heterozygous | *KCNE1* | 219 | A112G | S38G | rs1805127 |
| 69 | 24 | Days | Undetermined (Co-sleeping) | 3 | G | T | Heterozygous | *SCN5A* | 198056 | C1571A | S524Y | rs41313691 |
| 69 | 24 | Days | Undetermined (Co-sleeping) | 3 | A | G | Homozygous | *SCN10A* | 6514 | T3218C | V1073A | rs6795970 |
| 69 | 24 | Days | Undetermined (Co-sleeping) | 3 | G | T | Heterozygous | *SCN5A* | 198056 | C3308A | S1103Y | rs7626962 |
| 70 | 13 | Days | Undetermined (Co-sleeping) | 7 | T | G | Heterozygous | *KCNH2* | 172057 | A1670C | K557T | rs1805123 |
| 70 | 13 | Days | Undetermined (Co-sleeping) | 21 | T | C | Homozygous | *KCNE1* | 219 | A112G | S38G | rs1805127 |
| 70 | 13 | Days | Undetermined (Co-sleeping) | 3 | C | A | Heterozygous | *SCN5A* | 198056 | G5851T | V1951L | rs41315493 |
| 70 | 13 | Days | Undetermined (Co-sleeping) | 3 | A | G | Homozygous | *SCN10A* | 6514 | T3218C | V1073A | rs6795970 |
| 71 | 1 | Months | Undetermined (Co-sleeping) | 21 | T | C | Heterozygous | *KCNE1* | 219 | A112G | S38G | rs1805127 |
| 71 | 1 | Months | Undetermined (Co-sleeping) | 3 | A | G | Heterozygous | *SCN10A* | 6514 | T3218C | V1073A | rs6795970 |
| 72 | 2 | Months | Undetermined | 12 | C | T | Heterozygous | *PKP2* | 1005242 | G1627A | V543I (V587I) | rs146102241 |
| 72 | 2 | Months | Undetermined | 3 | T | C | Homozygous | *SCN5A* | 1160160 | A1673G | H558R | rs1805124 |
| 72 | 2 | Months | Undetermined | 11 | G | A | Heterozygous | *MYBPC3* | 256 | C2499T | A833V | RS3729952 |
| 72 | 2 | Months | Undetermined | 3 | A | G | Homozygous | *SCN10A* | 6514 | T3218C | V1073A | rs6795970 |
| 73 | 1 | Months | SIDS | 21 | T | C | Heterozygous | *KCNE1* | 219 | A112G | S38G | rs1805127 |
| 73 | 1 | Months | SIDS | 3 | C | A | Heterozygous | *SCN5A* | 198056 | G5851T | V1951L | rs41315493 |
| 73 | 1 | Months | SIDS | 3 | A | G | Heterozygous | *SCN10A* | 6514 | T3218C | V1073A | rs6795970 |
| 74 | 5 | Months | Undetermined (Co-sleeping) | 21 | T | C | Homozygous | *KCNE1* | 219 | A112G | S38G | rs1805127 |
| 74 | 5 | Months | Undetermined (Co-sleeping) | 11 | C | T | Heterozygous | *KCNQ1* | 181798 | C1418T | T473M | rs34516117 |
| 74 | 5 | Months | Undetermined (Co-sleeping) | 3 | G | T | Heterozygous | *SCN5A* | 198056 | C1571A | S524Y | rs41313691 |
| 74 | 5 | Months | Undetermined (Co-sleeping) | 3 | A | G | Homozygous | *SCN10A* | 6514 | T3218C | V1073A | rs6795970 |
| 75 | 1 | Months | SIDS | 7 | T | G | Heterozygous | *KCNH2* | 172057 | A1670C | K557T | rs1805123 |
| 75 | 1 | Months | SIDS | 21 | T | C | Heterozygous | *KCNE1* | 219 | A112G | S38G | rs1805127 |
| 75 | 1 | Months | SIDS | 3 | A | G | Homozygous | *SCN10A* | 6514 | T3218C | V1073A | rs6795970 |
| 76 | 10 | Days | Undetermined (Co-sleeping) | 6 | G | A | Heterozygous | *DSP* | 4415 | G88A | V30M | rs121912998 |
| 76 | 10 | Days | Undetermined (Co-sleeping) | 3 | T | C | Heterozygous | *SCN5A* | 1160160 | A1673G | H558R | rs1805124 |
| 76 | 10 | Days | Undetermined (Co-sleeping) | 21 | T | C | Heterozygous | *KCNE1* | 219 | A112G | S38G | rs1805127 |
| 76 | 10 | Days | Undetermined (Co-sleeping) | 18 | G | A | Heterozygous | *DSG2* | 1943 | G1174A | V392I | rs193922639 |
| 76 | 10 | Days | Undetermined (Co-sleeping) | 3 | A | G | Homozygous | *SCN10A* | 6514 | T3218C | V1073A | rs6795970 |
| 77 | 1 | Months | Undetermined (Co-sleeping) | 1 | G | A |  | *RYR2* | 1035 | G5656A | G1886S | rs3766871 |
| 77 | 1 | Months | Undetermined (Co-sleeping) | 10 | G | A | Heterozygous | *LDB3* | 1080114 | G349A | D117N | rs121908338 |
| 77 | 1 | Months | Undetermined (Co-sleeping) | 7 | T | G | Heterozygous | *KCNH2* | 172057 | A1670C | K557T | rs1805123 |
| 77 | 1 | Months | Undetermined (Co-sleeping) | 3 | T | C | Heterozygous | *SCN5A* | 1160160 | A1673G | H558R | rs1805124 |
| 77 | 1 | Months | Undetermined (Co-sleeping) | 21 | T | C | Homozygous | *KCNE1* | 219 | A112G | S38G | rs1805127 |
| 77 | 1 | Months | Undetermined (Co-sleeping) | 3 | A | G | Homozygous | *SCN10A* | 6514 | T3218C | V1073A | rs6795970 |
| 78 | 3 | Months | Undetermined | 1 | G | A |  | *RYR2* | 1035 | G5656A | G1886S | rs3766871 |
| 78 | 3 | Months | Undetermined | 3 | C | A | Heterozygous | *SCN5A* | 198056 | G5851T | V1951L | rs41315493 |
| 78 | 3 | Months | Undetermined | 3 | A | G | Heterozygous | *SCN10A* | 6514 | T3218C | V1073A | rs6795970 |
| 79 | 2 | Months | SIDS | 7 | T | G | Heterozygous | *KCNH2* | 172057 | A1670C | K557T | rs1805123 |
| 79 | 2 | Months | SIDS | 3 | T | C | Heterozygous | *SCN5A* | 1160160 | A1673G | H558R | rs1805124 |
| 79 | 2 | Months | SIDS | 21 | T | C | Homozygous | *KCNE1* | 219 | A112G | S38G | rs1805127 |
| 79 | 2 | Months | SIDS | 3 | A | G | Homozygous | *SCN10A* | 6514 | T3218C | V1073A | rs6795970 |
| 80 | 5 | Months | Undetermined | 3 | T | C | Homozygous | *SCN5A* | 1160160 | A1673G | H558R | rs1805124 |
| 80 | 5 | Months | Undetermined | 21 | T | C | Heterozygous | *KCNE1* | 219 | A112G | S38G | rs1805127 |
| 80 | 5 | Months | Undetermined | 3 | A | G | Homozygous | *SCN10A* | 6514 | T3218C | V1073A | rs6795970 |
| 81 | 2 | Months | SIDS | 3 | T | C | Heterozygous | *SCN5A* | 1160160 | A1673G | H558R | rs1805124 |
| 81 | 2 | Months | SIDS | 21 | T | C | Homozygous | *KCNE1* | 219 | A112G | S38G | rs1805127 |
| 81 | 2 | Months | SIDS | 3 | A | G | Heterozygous | *SCN10A* | 6514 | T3218C | V1073A | rs6795970 |
| 82 | 1 | Months | Undetermined (Co-sleeping) | 1 | G | A |  | *RYR2* | 1035 | G5656A | G1886S | rs3766871 |
| 82 | 1 | Months | Undetermined (Co-sleeping) | 21 | T | C | Homozygous | *KCNE1* | 219 | A112G | S38G | rs1805127 |
| 82 | 1 | Months | Undetermined (Co-sleeping) | 3 | G | T | Heterozygous | *SCN5A* | 198056 | C1571A | S524Y | rs41313691 |
| 82 | 1 | Months | Undetermined (Co-sleeping) | 3 | A | G | Homozygous | *SCN10A* | 6514 | T3218C | V1073A | rs6795970 |
| 83 | 4 | Months | SIDS | 7 | T | G | Homozygous | *KCNH2* | 172057 | A1670C | K557T | rs1805123 |
| 83 | 4 | Months | SIDS | 21 | T | C | Homozygous | *KCNE1* | 219 | A112G | S38G | rs1805127 |
| 83 | 4 | Months | SIDS | 3 | A | G | Heterozygous | *SCN10A* | 6514 | T3218C | V1073A | rs6795970 |
| 84 | 1 | Months | Undetermined (Co-sleeping) | 1 | G | A |  | *RYR2* | 1035 | G5656A | G1886S | rs3766871 |
| 84 | 1 | Months | Undetermined (Co-sleeping) | 3 | T | C | Heterozygous | *SCN5A* | 1160160 | A1673G | H558R | rs1805124 |
| 84 | 1 | Months | Undetermined (Co-sleeping) | 21 | T | C | Homozygous | *KCNE1* | 219 | A112G | S38G | rs1805127 |
| 84 | 1 | Months | Undetermined (Co-sleeping) | 11 | G | C | Heterozygous | *MYBPC3* | 256 | C2871G | T957S | rs193922380 |
| 85 | 2 | Months | Undetermined | 3 | T | C | Heterozygous | *SCN5A* | 1160160 | A1673G | H558R | rs1805124 |
| 85 | 2 | Months | Undetermined | 21 | T | C | Heterozygous | *KCNE1* | 219 | A112G | S38G | rs1805127 |
| 85 | 2 | Months | Undetermined | 3 | A | G | Heterozygous | *SCN10A* | 6514 | T3218C | V1073A | rs6795970 |
| 86 | 2 | Months | Undetermined | 3 | G | A | Heterozygous | *SCN10A* | 6514 | C5657T | A1886V | Rs142653846 |
| 86 | 2 | Months | Undetermined | 21 | T | C | Heterozygous | *KCNE1* | 219 | A112G | S38G | rs1805127 |
| 86 | 2 | Months | Undetermined | 3 | A | G | Heterozygous | *SCN10A* | 6514 | T3218C | V1073A | rs6795970 |
| 87 | 1 | Months | Undetermined | 7 | T | G | Heterozygous | *KCNH2* | 172057 | A1670C | K557T | rs1805123 |
| 87 | 1 | Months | Undetermined | 21 | T | C | Heterozygous | *KCNE1* | 219 | A112G | S38G | rs1805127 |
| 87 | 1 | Months | Undetermined | 3 | A | G | Homozygous | *SCN10A* | 6514 | T3218C | V1073A | rs6795970 |
| 87 | 1 | Months | Undetermined | 3 | G | T | Heterozygous | *SCN5A* | 198056 | C3308A | S1103Y | rs7626962 |
| 88 | 2 | Months | SIDS | 3 | T | C | Heterozygous | *SCN5A* | 1160160 | A1673G | H558R | rs1805124 |
| 88 | 2 | Months | SIDS | 21 | T | C | Homozygous | *KCNE1* | 219 | A112G | S38G | rs1805127 |
| 88 | 2 | Months | SIDS | 3 | A | G | Homozygous | *SCN10A* | 6514 | T3218C | V1073A | rs6795970 |
| 89 | 2 | Months | SIDS | 3 | G | A | Heterozygous | *SCN5A* | 198056 | C3269T | P1090L | rs1805125 |
| 89 | 2 | Months | SIDS | 21 | T | C | Heterozygous | *KCNE1* | 219 | A112G | S38G | rs1805127 |
| 89 | 2 | Months | SIDS | 4 | C | A | Heterozygous | *ANK2* | 1148 | C11218A | L3740I (L1622I) | rs35530544 |
| 89 | 2 | Months | SIDS | 1 | G | A | Heterozygous | *RYR2* | 1035 | G5654A | G1885E | rs41315858 |
| 89 | 2 | Months | SIDS | 3 | A | G | Homozygous | *SCN10A* | 6514 | T3218C | V1073A | rs6795970 |
| 90 | 2 | Months | Undetermined | 21 | T | C | Homozygous | *KCNE1* | 219 | A112G | S38G | rs1805127 |
| 90 | 2 | Months | Undetermined | 17 | C | T | Heterozygous | *SCN4A* | 334 | G2341A | V781I | rs62070884 |
| 90 | 2 | Months | Undetermined | 3 | A | G | Homozygous | *SCN10A* | 6514 | T3218C | V1073A | rs6795970 |
| 91 | 3 | Months | SIDS | 7 | T | G | Heterozygous | *KCNH2* | 172057 | A1670C | K557T | rs1805123 |
| 91 | 3 | Months | SIDS | 21 | T | C | Heterozygous | *KCNE1* | 219 | A112G | S38G | rs1805127 |
| 91 | 3 | Months | SIDS | 3 | A | G | Homozygous | *SCN10A* | 6514 | T3218C | V1073A | rs6795970 |
| 93 | 3 | Months | SIDS | 21 | T | C | Homozygous | *KCNE1* | 219 | A112G | S38G | rs1805127 |
| 93 | 3 | Months | SIDS | 3 | C | T | Heterozygous | *SCN5A* | 1160160 | G3575A | R1192Q, R1193Q, R1993Q? | rs41261344 |
| 93 | 3 | Months | SIDS | 1 | G | A | Heterozygous | *RYR2* | 1035 | G5654A | G1885E | rs41315858 |
| 93 | 3 | Months | SIDS | 3 | A | G | Heterozygous | *SCN10A* | 6514 | T3218C | V1073A | rs6795970 |
| 95 | 7 | Weeks | Undetermined (Co-sleeping) | 1 | G | A |  | *RYR2* | 1035 | G5656A | G1886S | rs3766871 |
| 95 | 7 | Weeks | Undetermined (Co-sleeping) | 21 | T | C | Heterozygous | *KCNE1* | 219 | A112G | S38G | rs1805127 |
| 95 | 7 | Weeks | Undetermined (Co-sleeping) | 11 | C | T | Heterozygous | *MYBPC3* | 256 | G530A | R177H | rs201012766 |
| 95 | 7 | Weeks | Undetermined (Co-sleeping) | 3 | A | G | Heterozygous | *SCN10A* | 6514 | T3218C | V1073A | rs6795970 |
| 96 | 1 | Months | Undetermined (Co-sleeping) | 3 | T | C | Heterozygous | *SCN5A* | 1160160 | A1673G | H558R | rs1805124 |
| 96 | 1 | Months | Undetermined (Co-sleeping) | 21 | T | C | Heterozygous | *KCNE1* | 219 | A112G | S38G | rs1805127 |
| 96 | 1 | Months | Undetermined (Co-sleeping) | 3 | C | T | Heterozygous | *SCN5A* | 198056 | G436A | V146M | rs199473061 |
| 96 | 1 | Months | Undetermined (Co-sleeping) | 3 | A | G | Heterozygous | *SCN10A* | 6514 | T3218C | V1073A | rs6795970 |
| 97 | 6 | Months | Undetermined | 21 | T | C | Homozygous | *KCNE1* | 219 | A112G | S38G | rs1805127 |
| 98 | 7 | Months | SIDS | 3 | T | C | Homozygous | *SCN5A* | 1160160 | A1673G | H558R | rs1805124 |
| 98 | 7 | Months | SIDS | 21 | T | C | Homozygous | *KCNE1* | 219 | A112G | S38G | rs1805127 |
| 98 | 7 | Months | SIDS | 17 | C | T | Heterozygous | *SCN4A* | 334 | G2341A | V781I | rs62070884 |
| 98 | 7 | Months | SIDS | 3 | A | G | Homozygous | *SCN10A* | 6514 | T3218C | V1073A | rs6795970 |
| 99 | 1 | Months | SIDS | 6 | G | A | Heterozygous | *DSP* | 4415 | G88A | V30M | rs121912998 |
| 99 | 1 | Months | SIDS | 7 | T | G | Heterozygous | *KCNH2* | 172057 | A1670C | K557T | rs1805123 |
| 99 | 1 | Months | SIDS | 3 | T | C | Heterozygous | *SCN5A* | 1160160 | A1673G | H558R | rs1805124 |
| 99 | 1 | Months | SIDS | 21 | T | C | Homozygous | *KCNE1* | 219 | A112G | S38G | rs1805127 |
| 99 | 1 | Months | SIDS | 3 | A | G | Homozygous | *SCN10A* | 6514 | T3218C | V1073A | rs6795970 |
| 100 | 1 | Months | Undetermined (Co-sleeping) | 1 | G | A |  | *RYR2* | 1035 | G5656A | G1886S | rs3766871 |
| 100 | 1 | Months | Undetermined (Co-sleeping) | 21 | T | C | Homozygous | *KCNE1* | 219 | A112G | S38G | rs1805127 |
| 100 | 1 | Months | Undetermined (Co-sleeping) | 10 | A | G | Heterozygous | *LDB3* | 7078 | A752G | K251R | rs34423165 |
| 100 | 1 | Months | Undetermined (Co-sleeping) | 11 | G | A | Heterozygous | *MYBPC3* | 256 | C2499T | A833V | RS3729952 |
| 100 | 1 | Months | Undetermined (Co-sleeping) | 3 | A | G | Homozygous | *SCN10A* | 6514 | T3218C | V1073A | rs6795970 |
| 101 | 3 | Months | Undetermined (Co-sleeping) | 1 | G | A |  | *RYR2* | 1035 | G5656A | G1886S | rs3766871 |
| 101 | 3 | Months | Undetermined (Co-sleeping) | 21 | T | C | Heterozygous | *KCNE1* | 219 | A112G | S38G | rs1805127 |
| 101 | 3 | Months | Undetermined (Co-sleeping) | 10 | A | G | Homozygous | *LDB3* | 7078 | A752G | K251R | rs34423165 |
| 101 | 3 | Months | Undetermined (Co-sleeping) | 3 | A | G | Heterozygous | *SCN10A* | 6514 | T3218C | V1073A | rs6795970 |
| 102 | 2 | Months | SIDS | 11 | G | C | Heterozygous | *MYBPC3* | 256 | C2993G | Q998E | rs11570112 |
| 102 | 2 | Months | SIDS | 21 | T | C | Homozygous | *KCNE1* | 219 | A112G | S38G | rs1805127 |
| 102 | 2 | Months | SIDS | 3 | C | A | Heterozygous | *SCN5A* | 198056 | G5851T | V1951L | rs41315493 |
| 102 | 2 | Months | SIDS | 17 | C | T | Heterozygous | *SCN4A* | 334 | G2341A | V781I | rs62070884 |
| 102 | 2 | Months | SIDS | 3 | A | G | Heterozygous | *SCN10A* | 6514 | T3218C | V1073A | rs6795970 |
| 103 | 8 | Months | Undetermined (Co-sleeping) | 1 | G | A |  | *RYR2* | 1035 | G5656A | G1886S | rs3766871 |
| 103 | 8 | Months | Undetermined (Co-sleeping) | 21 | T | C | Homozygous | *KCNE1* | 219 | A112G | S38G | rs1805127 |
| 103 | 8 | Months | Undetermined (Co-sleeping) | 3 | A | G | Heterozygous | *SCN10A* | 6514 | T3218C | V1073A | rs6795970 |
| 104 | 2 | Months | SIDS | 3 | T | C | Heterozygous | *SCN5A* | 1160160 | A1673G | H558R | rs1805124 |
| 104 | 2 | Months | SIDS | 3 | A | G | Homozygous | *SCN10A* | 6514 | T3218C | V1073A | rs6795970 |
| 106 | 2 | Months | Undetermined (Co-sleeping) | 1 | G | A |  | *RYR2* | 1035 | G5656A | G1886S | rs3766871 |
| 106 | 2 | Months | Undetermined (Co-sleeping) | 3 | T | C | Heterozygous | *SCN5A* | 1160160 | A1673G | H558R | rs1805124 |
| 106 | 2 | Months | Undetermined (Co-sleeping) | 21 | T | C | Homozygous | *KCNE1* | 219 | A112G | S38G | rs1805127 |
| 106 | 2 | Months | Undetermined (Co-sleeping) | 3 | A | G | Homozygous | *SCN10A* | 6514 | T3218C | V1073A | rs6795970 |
| 107 | 6 | Months | Undetermined (Co-sleeping) | 21 | T | C | Homozygous | *KCNE1* | 219 | A112G | S38G | rs1805127 |
| 107 | 6 | Months | Undetermined (Co-sleeping) | 3 | A | G | Homozygous | *SCN10A* | 6514 | T3218C | V1073A | rs6795970 |
| 108 | 4 | Months | Undetermined | 3 | T | C | Heterozygous | *SCN5A* | 1160160 | A1673G | H558R | rs1805124 |
| 108 | 4 | Months | Undetermined | 21 | T | C | Heterozygous | *KCNE1* | 219 | A112G | S38G | rs1805127 |
| 108 | 4 | Months | Undetermined | 3 | A | G | Heterozygous | *SCN10A* | 6514 | T3218C | V1073A | rs6795970 |
| 109 | 2 | Months | SIDS | 21 | T | C | Homozygous | *KCNE1* | 219 | A112G | S38G | rs1805127 |
| 109 | 2 | Months | SIDS | 3 | A | G | Heterozygous | *SCN10A* | 6514 | T3218C | V1073A | rs6795970 |
| 110 | 4 | Months | Undetermined (Co-sleeping) | 7 | T | G | Heterozygous | *KCNH2* | 172057 | A1670C | K557T | rs1805123 |
| 110 | 4 | Months | Undetermined (Co-sleeping) | 3 | A | G | Homozygous | *SCN10A* | 6514 | T3218C | V1073A | rs6795970 |
| 111 | 1 | Months | Undetermined (Co-sleeping) | 21 | T | C | Heterozygous | *KCNE1* | 219 | A112G | S38G | rs1805127 |
| 111 | 1 | Months | Undetermined (Co-sleeping) | 3 | A | G | Homozygous | *SCN10A* | 6514 | T3218C | V1073A | rs6795970 |
| 112 | 2 | Months | SIDS | 21 | T | C | Homozygous | *KCNE1* | 219 | A112G | S38G | rs1805127 |
| 112 | 2 | Months | SIDS | 3 | A | G | Homozygous | *SCN10A* | 6514 | T3218C | V1073A | rs6795970 |
| 113 | 4 | Months | Undetermined (Co-sleeping) | 3 | T | C | Homozygous | *SCN5A* | 1160160 | A1673G | H558R | rs1805124 |
| 113 | 4 | Months | Undetermined (Co-sleeping) | 21 | T | C | Homozygous | *KCNE1* | 219 | A112G | S38G | rs1805127 |
| 113 | 4 | Months | Undetermined (Co-sleeping) | 3 | A | G | Homozygous | *SCN10A* | 6514 | T3218C | V1073A | rs6795970 |
| 114 | 2 | Months | Undetermined (Co-sleeping) | 11 | G | C | Heterozygous | *MYBPC3* | 256 | C2993G | Q998E | rs11570112 |
| 114 | 2 | Months | Undetermined (Co-sleeping) | 3 | A | G | Homozygous | *SCN10A* | 6514 | T3218C | V1073A | rs6795970 |
| 116 | 1 | Months | Undetermined (Co-sleeping) | 12 | G | A | Heterozygous | *PKP2* | 1005242 | C419T | S140F | rs150821281 |
| 116 | 1 | Months | Undetermined (Co-sleeping) | 7 | T | G | Heterozygous | *KCNH2* | 172057 | A1670C | K557T | rs1805123 |
| 116 | 1 | Months | Undetermined (Co-sleeping) | 21 | T | C | Homozygous | *KCNE1* | 219 | A112G | S38G | rs1805127 |
| 116 | 1 | Months | Undetermined (Co-sleeping) | 3 | A | G | Heterozygous | *SCN10A* | 6514 | T3218C | V1073A | rs6795970 |
| 117 | 2 | Months | Undetermined | 21 | T | C | Heterozygous | *KCNE1* | 219 | A112G | S38G | rs1805127 |
| 117 | 2 | Months | Undetermined | 3 | A | G | Heterozygous | *SCN10A* | 6514 | T3218C | V1073A | rs6795970 |
| 118 | 2 | Months | Undetermined | 21 | T | C | Homozygous | *KCNE1* | 219 | A112G | S38G | rs1805127 |
| 118 | 2 | Months | Undetermined | 3 | A | G | Homozygous | *SCN10A* | 6514 | T3218C | V1073A | rs6795970 |
| 119 | 3 | Months | SIDS | 7 | T | G | Heterozygous | *KCNH2* | 172057 | A1670C | K557T | rs1805123 |
| 119 | 3 | Months | SIDS | 6 | A | T | Heterozygous | *DSP* | 4415 | A1481T | Y494F | rs28763961 |
| 119 | 3 | Months | SIDS | 3 | A | G | Heterozygous | *SCN10A* | 6514 | T3218C | V1073A | rs6795970 |
| 120 | 2 | Months | Undetermined | 7 | T | G | Heterozygous | *KCNH2* | 172057 | A1670C | K557T | rs1805123 |
| 120 | 2 | Months | Undetermined | 3 | T | C | Heterozygous | *SCN5A* | 1160160 | A1673G | H558R | rs1805124 |
| 120 | 2 | Months | Undetermined | 21 | T | C | Heterozygous | *KCNE1* | 219 | A112G | S38G | rs1805127 |
| 120 | 2 | Months | Undetermined | 3 | A | G | Heterozygous | *SCN10A* | 6514 | T3218C | V1073A | rs6795970 |
| 121 | 3 | Months | Undetermined | 3 | T | C | Heterozygous | *SCN5A* | 1160160 | A1673G | H558R | rs1805124 |
| 121 | 3 | Months | Undetermined | 21 | T | C | Heterozygous | *KCNE1* | 219 | A112G | S38G | rs1805127 |
| 121 | 3 | Months | Undetermined | 3 | A | G | Homozygous | *SCN10A* | 6514 | T3218C | V1073A | rs6795970 |
| 122 | 3 | Months | Undetermined | 1 | G | A |  | *RYR2* | 1035 | G5656A | G1886S | rs3766871 |
| 122 | 3 | Months | Undetermined | 3 | T | C | Heterozygous | *SCN5A* | 1160160 | A1673G | H558R | rs1805124 |
| 122 | 3 | Months | Undetermined | 21 | T | C | Heterozygous | *KCNE1* | 219 | A112G | S38G | rs1805127 |
| 122 | 3 | Months | Undetermined | 3 | A | G | Homozygous | *SCN10A* | 6514 | T3218C | V1073A | rs6795970 |
| 123 | 4 | Months | Undetermined | 7 | T | G | Heterozygous | *KCNH2* | 172057 | A1670C | K557T | rs1805123 |
| 123 | 4 | Months | Undetermined | 3 | T | C | Heterozygous | *SCN5A* | 1160160 | A1673G | H558R | rs1805124 |
| 123 | 4 | Months | Undetermined | 21 | T | C | Heterozygous | *KCNE1* | 219 | A112G | S38G | rs1805127 |
| 123 | 4 | Months | Undetermined | 3 | A | G | Homozygous | *SCN10A* | 6514 | T3218C | V1073A | rs6795970 |
| 123 | 4 | Months | Undetermined | 3 | G | T | Heterozygous | *SCN5A* | 198056 | C3308A | S1103Y | rs7626962 |
| 124 | 3 | Months | Undetermined (Co-sleeping) | 21 | T | C | Homozygous | *KCNE1* | 219 | A112G | S38G | rs1805127 |
| 124 | 3 | Months | Undetermined (Co-sleeping) | 10 | A | G | Heterozygous | *LDB3* | 7078 | A752G | K251R | rs34423165 |
| 124 | 3 | Months | Undetermined (Co-sleeping) | 3 | A | G | Heterozygous | *SCN10A* | 6514 | T3218C | V1073A | rs6795970 |
| 125 | 2 | Months | Undetermined (Co-sleeping) | 3 | T | C | Heterozygous | *SCN5A* | 1160160 | A1673G | H558R | rs1805124 |
| 125 | 2 | Months | Undetermined (Co-sleeping) | 21 | T | C | Homozygous | *KCNE1* | 219 | A112G | S38G | rs1805127 |
| 125 | 2 | Months | Undetermined (Co-sleeping) | 3 | A | G | Homozygous | *SCN10A* | 6514 | T3218C | V1073A | rs6795970 |
| 126 | 1 | Months | SIDS | 3 | T | C | Homozygous | *SCN5A* | 1160160 | A1673G | H558R | rs1805124 |
| 126 | 1 | Months | SIDS | 3 | A | G | Heterozygous | *SCN10A* | 6514 | T3218C | V1073A | rs6795970 |
| 127 | 1 | Months | Undetermined (Co-sleeping) | 21 | T | C | Heterozygous | *KCNE1* | 219 | A112G | S38G | rs1805127 |
| 127 | 1 | Months | Undetermined (Co-sleeping) | 3 | A | G | Heterozygous | *SCN10A* | 6514 | T3218C | V1073A | rs6795970 |
| 128 | 3 | Months | SIDS | 3 | T | C | Heterozygous | *SCN5A* | 1160160 | A1673G | H558R | rs1805124 |
| 128 | 3 | Months | SIDS | 3 | C | A | Heterozygous | *SCN5A* | 198056 | G5851T | V1951L | rs41315493 |
| 128 | 3 | Months | SIDS | 3 | A | G | Homozygous | *SCN10A* | 6514 | T3218C | V1073A | rs6795970 |
| 129 | 2 | Months | Undetermined (Co-sleeping) | 21 | T | C | Homozygous | *KCNE1* | 219 | A112G | S38G | rs1805127 |
| 129 | 2 | Months | Undetermined (Co-sleeping) | 7 | C | T | Heterozygous | *KCNH2* | 172057 | G1597A | G533S | rs41314354 |
| 129 | 2 | Months | Undetermined (Co-sleeping) | 3 | A | G | Homozygous | *SCN10A* | 6514 | T3218C | V1073A | rs6795970 |
| 130 | 3 | Months | Undetermined (Co-sleeping) | 3 | T | C | Heterozygous | *SCN5A* | 1160160 | A1673G | H558R | rs1805124 |
| 130 | 3 | Months | Undetermined (Co-sleeping) | 21 | T | C | Homozygous | *KCNE1* | 219 | A112G | S38G | rs1805127 |
| 130 | 3 | Months | Undetermined (Co-sleeping) | 3 | A | G | Homozygous | *SCN10A* | 6514 | T3218C | V1073A | rs6795970 |
| 130 | 3 | Months | Undetermined (Co-sleeping) | 3 | G | T | Heterozygous | *SCN5A* | 198056 | C3308A | S1103Y | rs7626962 |
| 131 | 1 | Months | SIDS | 3 | A | G | Homozygous | *SCN10A* | 6514 | T3218C | V1073A | rs6795970 |
| 132 | 2 | Months | Undetermined | 1 | G | A |  | *RYR2* | 1035 | G5656A | G1886S | rs3766871 |
| 132 | 2 | Months | Undetermined | 10 | C | A | Heterozygous | *ANKRD1* | 14391 | G319T | V107L | rs114435632 |
| 132 | 2 | Months | Undetermined | 21 | T | C | Heterozygous | *KCNE1* | 219 | A112G | S38G | rs1805127 |
| 132 | 2 | Months | Undetermined | 3 | A | G | Homozygous | *SCN10A* | 6514 | T3218C | V1073A | rs6795970 |
| 133 | 26 | Days | Undetermined (Co-sleeping) | 21 | T | C | Homozygous | *KCNE1* | 219 | A112G | S38G | rs1805127 |
| 133 | 26 | Days | Undetermined (Co-sleeping) | 3 | A | G | Heterozygous | *SCN10A* | 6514 | T3218C | V1073A | rs6795970 |
| 134 | 2 | Months | SIDS | 3 | G | A | Heterozygous | *SCN5A* | 198056 | C1441T | R481W | rs144511230 |
| 134 | 2 | Months | SIDS | 3 | T | C | Heterozygous | *SCN5A* | 1160160 | A1673G | H558R | rs1805124 |
| 134 | 2 | Months | SIDS | 21 | T | C | Heterozygous | *KCNE1* | 219 | A112G | S38G | rs1805127 |
| 134 | 2 | Months | SIDS | 10 | A | G | Heterozygous | *LDB3* | 7078 | A752G | K251R | rs34423165 |
| 134 | 2 | Months | SIDS | 4 | C | A | Heterozygous | *ANK2* | 1148 | C11218A | L3740I (L1622I) | rs35530544 |
| 134 | 2 | Months | SIDS | 3 | A | G | Homozygous | *SCN10A* | 6514 | T3218C | V1073A | rs6795970 |
| 135 | 1 | Months | Undetermined (Co-sleeping) | 21 | T | C | Homozygous | *KCNE1* | 219 | A112G | S38G | rs1805127 |
| 135 | 1 | Months | Undetermined (Co-sleeping) | 3 | A | G | Homozygous | *SCN10A* | 6514 | T3218C | V1073A | rs6795970 |
| 136 | 4 | Months | SIDS | 7 | T | G | Heterozygous | *KCNH2* | 172057 | A1670C | K557T | rs1805123 |
| 136 | 4 | Months | SIDS | 21 | T | C | Homozygous | *KCNE1* | 219 | A112G | S38G | rs1805127 |
| 136 | 4 | Months | SIDS | 1 | G | A | Heterozygous | *RYR2* | 1035 | G5654A | G1885E | rs41315858 |
| 136 | 4 | Months | SIDS | 3 | A | G | Heterozygous | *SCN10A* | 6514 | T3218C | V1073A | rs6795970 |
| 137 | 1 | Months | Undetermined (Co-sleeping) | 21 | T | C | Heterozygous | *KCNE1* | 219 | A112G | S38G | rs1805127 |
| 137 | 1 | Months | Undetermined (Co-sleeping) | 3 | A | G | Heterozygous | *SCN10A* | 6514 | T3218C | V1073A | rs6795970 |
| 139 | 3 | Months | SIDS | 3 | T | C | Heterozygous | *SCN5A* | 1160160 | A1673G | H558R | rs1805124 |
| 139 | 3 | Months | SIDS | 21 | T | C | Heterozygous | *KCNE1* | 219 | A112G | S38G | rs1805127 |
| 139 | 3 | Months | SIDS | 3 | A | G | Homozygous | *SCN10A* | 6514 | T3218C | V1073A | rs6795970 |
| 140 | 2 | Months | SIDS | 3 | T | C | Heterozygous | *SCN5A* | 1160160 | A1673G | H558R | rs1805124 |
| 140 | 2 | Months | SIDS | 1 | G | A | Heterozygous | *RYR2* | 1035 | G5654A | G1885E | rs41315858 |
| 140 | 2 | Months | SIDS | 3 | A | G | Homozygous | *SCN10A* | 6514 | T3218C | V1073A | rs6795970 |
| 140 | 2 | Months | SIDS | 1 | A | G | Heterozygous | *ACADM* | 16 | A985G | K329E | rs77931234 |
| 141 | 2 | Months | Undetermined | 21 | T | C | Heterozygous | *KCNE1* | 219 | A112G | S38G | rs1805127 |
| 141 | 2 | Months | Undetermined | 3 | A | G | Homozygous | *SCN10A* | 6514 | T3218C | V1073A | rs6795970 |
| 142 | 7 | Months | Undetermined | 11 | G | C | Heterozygous | *MYBPC3* | 256 | C2993G | Q998E | rs11570112 |
| 142 | 7 | Months | Undetermined | 7 | T | G | Heterozygous | *KCNH2* | 172057 | A1670C | K557T | rs1805123 |
| 142 | 7 | Months | Undetermined | 3 | T | C | Heterozygous | *SCN5A* | 1160160 | A1673G | H558R | rs1805124 |
| 142 | 7 | Months | Undetermined | 21 | T | C | Heterozygous | *KCNE1* | 219 | A112G | S38G | rs1805127 |
| 142 | 7 | Months | Undetermined | 3 | A | G | Homozygous | *SCN10A* | 6514 | T3218C | V1073A | rs6795970 |
| 143 | 4 | Months | SIDS | 3 | T | C | Homozygous | *SCN5A* | 1160160 | A1673G | H558R | rs1805124 |
| 143 | 4 | Months | SIDS | 21 | T | C | Homozygous | *KCNE1* | 219 | A112G | S38G | rs1805127 |
| 143 | 4 | Months | SIDS | 3 | A | G | Heterozygous | *SCN10A* | 6514 | T3218C | V1073A | rs6795970 |
| 144 | 1 | Months | Undetermined | 21 | T | C | Homozygous | *KCNE1* | 219 | A112G | S38G | rs1805127 |
| 144 | 1 | Months | Undetermined | 3 | C | A | Heterozygous | *SCN5A* | 198056 | G5851T | V1951L | rs41315493 |
| 144 | 1 | Months | Undetermined | 3 | A | G | Heterozygous | *SCN10A* | 6514 | T3218C | V1073A | rs6795970 |
| 145 | 2 | Months | Undetermined (Co-sleeping) | 21 | T | C | Homozygous | *KCNE1* | 219 | A112G | S38G | rs1805127 |
| 145 | 2 | Months | Undetermined (Co-sleeping) | 3 | A | G | Homozygous | *SCN10A* | 6514 | T3218C | V1073A | rs6795970 |
| 145 | 2 | Months | Undetermined (Co-sleeping) | 3 | G | T | Heterozygous | *SCN5A* | 198056 | C3308A | S1103Y | rs7626962 |
| 146 | 3 | Months | SIDS | 21 | T | C | Heterozygous | *KCNE1* | 219 | A112G | S38G | rs1805127 |
| 146 | 3 | Months | SIDS | 3 | C | A | Heterozygous | *SCN5A* | 1160161 | G5851T | V1951L | rs41315493 |
| 146 | 3 | Months | SIDS | 3 | A | G | Homozygous | *SCN10A* | 6514 | T3218C | V1073A | rs6795970 |
| 147 | 3 | Months | SIDS | 3 | T | C | Heterozygous | *SCN5A* | 198056 | A1673G | H558R | rs1805124 |
| 147 | 3 | Months | SIDS | 21 | T | C | Homozygous | *KCNE1* | 219 | A112G | S38G | rs1805127 |
| 147 | 3 | Months | SIDS | 3 | A | G | Heterozygous | *SCN10A* | 6514 | T3218C | V1073A | rs6795970 |
| 148 | 1 | Months | Undetermined | 3 | T | C | Heterozygous | *SCN5A* | 1160161 | A1673G | H558R | rs1805124 |
| 148 | 1 | Months | Undetermined | 21 | T | C | Heterozygous | *KCNE1* | 219 | A112G | S38G | rs1805127 |
| 148 | 1 | Months | Undetermined | 10 | A | G | Heterozygous | *LDB3* | 7078 | A752G | K251R | rs34423165 |
| 148 | 1 | Months | Undetermined | 3 | A | G | Homozygous | *SCN10A* | 6514 | T3218C | V1073A | rs6795970 |
| 149 | 4 | Months | SIDS | 21 | T | C | Heterozygous | *KCNE1* | 219 | A112G | S38G | rs1805127 |
| 149 | 4 | Months | SIDS | 3 | A | G | Homozygous | *SCN10A* | 6514 | T3218C | V1073A | rs6795970 |
| 150 | 2 | Months | Undetermined | 3 | T | C | Heterozygous | *SCN5A* | 1160161 | A1673G | H558R | rs1805124 |
| 150 | 2 | Months | Undetermined | 21 | T | C | Heterozygous | *KCNE1* | 219 | A112G | S38G | rs1805127 |
| 150 | 2 | Months | Undetermined | 3 | G | T | Heterozygous | *SCN5A* | 198056 | C1571A | S524Y | rs41313691 |
| 150 | 2 | Months | Undetermined | 3 | A | G | Homozygous | *SCN10A* | 6514 | T3218C | V1073A | rs6795970 |
| 151 | 3 | Months | Undetermined (Co-sleeping) | 3 | T | C | Heterozygous | *SCN5A* | 1160161 | A1673G | H558R | rs1805124 |
| 151 | 3 | Months | Undetermined (Co-sleeping) | 21 | T | C | Homozygous | *KCNE1* | 219 | A112G | S38G | rs1805127 |
| 151 | 3 | Months | Undetermined (Co-sleeping) | 3 | A | G | Homozygous | *SCN10A* | 6514 | T3218C | V1073A | rs6795970 |
| 152 | 2 | Months | Undetermined (Co-sleeping) | 3 | G | A | Heterozygous | *SCN10A* | 6514 | C5657T | A1886V | Rs142653846 |
| 152 | 2 | Months | Undetermined (Co-sleeping) | 21 | C | G | Heterozygous | *KCNE2* | 172201 | C256 | Q9E | rs16991652 |
| 152 | 2 | Months | Undetermined (Co-sleeping) | 21 | T | C | Heterozygous | *KCNE1* | 219 | A112G | S38G | rs1805127 |
| 152 | 2 | Months | Undetermined (Co-sleeping) | 3 | A | G | Homozygous | *SCN10A* | 6514 | T3218C | V1073A | rs6795970 |
| 153 | 3 | Months | SIDS | 3 | T | C | Heterozygous | *SCN5A* | 1160161 | A1673G | H558R | rs1805124 |
| 153 | 3 | Months | SIDS | 21 | T | C | Homozygous | *KCNE1* | 219 | A112G | S38G | rs1805127 |
| 153 | 3 | Months | SIDS | 3 | A | G | Homozygous | *SCN10A* | 6514 | T3218C | V1073A | rs6795970 |
| 154 | 2 | Months | SIDS | 11 | G | C | Heterozygous | *MYBPC3* | 256 | C2993G | Q998E | rs11570112 |
| 154 | 2 | Months | SIDS | 3 | T | C | Heterozygous | *SCN5A* | 1160161 | A1673G | H558R | rs1805124 |
| 154 | 2 | Months | SIDS | 21 | T | C | Heterozygous | *KCNE1* | 219 | A112G | S38G | rs1805127 |
| 154 | 2 | Months | SIDS | 3 | A | G | Homozygous | *SCN10A* | 6514 | T3218C | V1073A | rs6795970 |
| 155 | 1 | Months | SIDS | 3 | T | C | Heterozygous | *SCN5A* | 1160161 | A1673G | H558R | rs1805124 |
| 155 | 1 | Months | SIDS | 21 | T | C | Heterozygous | *KCNE1* | 219 | A112G | S38G | rs1805127 |
| 155 | 1 | Months | SIDS | 21 | A | G | Heterozygous | *KCNE2* | 172201 | A22G | T8A | rs2234916 |
| 155 | 1 | Months | SIDS | 3 | A | G | Homozygous | *SCN10A* | 6514 | T3218C | V1073A | rs6795970 |
| 155 | 1 | Months | SIDS | 3 | G | T | Heterozygous | *SCN5A* | 198056 | C3308A | S1103Y | rs7626962 |
| 156 | 2 | Months | Undetermined (Co-sleeping) | 3 | T | C | Heterozygous | *SCN5A* | 1160161 | A1673G | H558R | rs1805124 |
| 156 | 2 | Months | Undetermined (Co-sleeping) | 21 | T | C | Homozygous | *KCNE1* | 219 | A112G | S38G | rs1805127 |
| 156 | 2 | Months | Undetermined (Co-sleeping) | 3 | A | G | Homozygous | *SCN10A* | 6514 | T3218C | V1073A | rs6795970 |
| 157 | 8 | Months | Undetermined | 7 | T | G | Heterozygous | *KCNH2* | 172057 | A1670C | K557T | rs1805123 |
| 157 | 8 | Months | Undetermined | 21 | T | C | Heterozygous | *KCNE1* | 219 | A112G | S38G | rs1805127 |
| 158 | 2 | Months | Undetermined (Co-sleeping) | 1 | G | A |  | *RYR2* | 1035 | G5656A | G1886S | rs3766871 |
| 158 | 2 | Months | Undetermined (Co-sleeping) | 10 | C | T | Heterozygous | *VCL* | 14000 | C2801T | A934V | rs16931179 |
| 158 | 2 | Months | Undetermined (Co-sleeping) | 3 | T | C | Heterozygous | *SCN5A* | 1160161 | A1673G | H558R | rs1805124 |
| 158 | 2 | Months | Undetermined (Co-sleeping) | 21 | T | C | Homozygous | *KCNE1* | 219 | A112G | S38G | rs1805127 |
| 158 | 2 | Months | Undetermined (Co-sleeping) | 3 | G | A | Heterozygous | *SCN5A* | 1160161 | C1852T | L618F | rs45488304 |
| 158 | 2 | Months | Undetermined (Co-sleeping) | 3 | A | G | Homozygous | *SCN10A* | 6514 | T3218C | V1073A | rs6795970 |
| 159 | 3 | Months | SIDS | 21 | T | C | Heterozygous | *KCNE1* | 219 | A112G | S38G | rs1805127 |
| 159 | 3 | Months | SIDS | 3 | G | T | Heterozygous | *SCN5A* | 198056 | C1571A | S524Y | rs41313691 |
| 159 | 3 | Months | SIDS | 3 | A | G | Heterozygous | *SCN10A* | 6514 | T3218C | V1073A | rs6795970 |
| 160 | 2 | Months | Undetermined (Co-sleeping) | 3 | T | C | Heterozygous | *SCN5A* | 1160161 | A1673G | H558R | rs1805124 |
| 160 | 2 | Months | Undetermined (Co-sleeping) | 21 | T | C | Heterozygous | *KCNE1* | 219 | A112G | S38G | rs1805127 |
| 160 | 2 | Months | Undetermined (Co-sleeping) | 3 | A | G | Heterozygous | *SCN10A* | 6514 | T3218C | V1073A | rs6795970 |
| 162 | 1 | Months | SIDS | 21 | T | C | Heterozygous | *KCNE1* | 219 | A112G | S38G | rs1805127 |
| 162 | 1 | Months | SIDS | 3 | C | A | Heterozygous | *SCN5A* | 1160161 | G5851T | V1951L | rs41315493 |
| 162 | 1 | Months | SIDS | 3 | A | G | Heterozygous | *SCN10A* | 6514 | T3218C | V1073A | rs6795970 |
| 163 | 8 | Months | Undetermined | 21 | T | C | Heterozygous | *KCNE1* | 219 | A112G | S38G | rs1805127 |
| 163 | 8 | Months | Undetermined | 3 | A | G | Homozygous | *SCN10A* | 6514 | T3218C | V1073A | rs6795970 |
| 164 | 1 | Months | SIDS | 3 | T | C | Homozygous | *SCN5A* | 1160161 | A1673G | H558R | rs1805124 |
| 164 | 1 | Months | SIDS | 21 | T | C | Heterozygous | *KCNE1* | 219 | A112G | S38G | rs1805127 |
| 164 | 1 | Months | SIDS | 1 | G | A | Heterozygous | *RYR2* | 1035 | G5654A | G1885E | rs41315858 |
| 164 | 1 | Months | SIDS | 3 | A | G | Homozygous | *SCN10A* | 6514 | T3218C | V1073A | rs6795970 |
| 165 | 3 | Months | SIDS | 3 | T | C | Heterozygous | *SCN5A* | 1160161 | A1673G | H558R | rs1805124 |
| 165 | 3 | Months | SIDS | 21 | T | C | Homozygous | *KCNE1* | 219 | A112G | S38G | rs1805127 |
| 166 | 25 | Days | Undetermined (Co-sleeping) | 3 | C | T | Heterozygous | *SCN10A* | 6514 | G3803A | R1268Q | rs138832868 |
| 166 | 25 | Days | Undetermined (Co-sleeping) | 7 | T | G | Heterozygous | *KCNH2* | 172057 | A1670C | K557T | rs1805123 |
| 166 | 25 | Days | Undetermined (Co-sleeping) | 21 | T | C | Heterozygous | *KCNE1* | 219 | A112G | S38G | rs1805127 |
| 166 | 25 | Days | Undetermined (Co-sleeping) | 3 | A | G | Homozygous | *SCN10A* | 6514 | T3218C | V1073A | rs6795970 |
| 167 | 3 | Months | Undetermined (Co-sleeping) | 3 | T | C | Heterozygous | *SCN5A* | 1160161 | A1673G | H558R | rs1805124 |
| 167 | 3 | Months | Undetermined (Co-sleeping) | 3 | G | T | Heterozygous | *SCN5A* | 198056 | C1571A | S524Y | rs41313691 |
| 167 | 3 | Months | Undetermined (Co-sleeping) | 3 | A | G | Homozygous | *SCN10A* | 6514 | T3218C | V1073A | rs6795970 |
| 168 | 2 | Months | Undetermined (Co-sleeping) | 7 | T | G | Heterozygous | *KCNH2* | 172057 | A1670C | K557T | rs1805123 |
| 168 | 2 | Months | Undetermined (Co-sleeping) | 3 | T | C | Heterozygous | *SCN5A* | 1160161 | A1673G | H558R | rs1805124 |
| 168 | 2 | Months | Undetermined (Co-sleeping) | 21 | T | C | Homozygous | *KCNE1* | 219 | A112G | S38G | rs1805127 |
| 168 | 2 | Months | Undetermined (Co-sleeping) | 3 | A | G | Heterozygous | *SCN10A* | 6514 | T3218C | V1073A | rs6795970 |
| 169 | 6 | Months | Undetermined (Co-sleeping) | 7 | T | G | Heterozygous | *KCNH2* | 172057 | A1670C | K557T | rs1805123 |
| 169 | 6 | Months | Undetermined (Co-sleeping) | 21 | T | C | Heterozygous | *KCNE1* | 219 | A112G | S38G | rs1805127 |
| 169 | 6 | Months | Undetermined (Co-sleeping) | 3 | A | G | Homozygous | *SCN10A* | 6514 | T3218C | V1073A | rs6795970 |
| 170 | 1 | Months | SIDS | 1 | G | A |  | *RYR2* | 1035 | G5656A | G1886S | rs3766871 |
| 170 | 1 | Months | SIDS | 3 | T | C | Homozygous | *SCN5A* | 1160161 | A1673G | H558R | rs1805124 |
| 170 | 1 | Months | SIDS | 21 | T | C | Heterozygous | *KCNE1* | 219 | A112G | S38G | rs1805127 |
| 170 | 1 | Months | SIDS | 3 | A | G | Homozygous | *SCN10A* | 6514 | T3218C | V1073A | rs6795970 |
| 171 | 4 | Months | SIDS | 3 | T | C | Heterozygous | *SCN5A* | 1160161 | A1673G | H558R | rs1805124 |
| 171 | 4 | Months | SIDS | 21 | T | C | Heterozygous | *KCNE1* | 219 | A112G | S38G | rs1805127 |
| 171 | 4 | Months | SIDS | 3 | A | G | Homozygous | *SCN10A* | 6514 | T3218C | V1073A | rs6795970 |
| 172 | 7 | Months | Undetermined (Co-sleeping) | 21 | T | C | Homozygous | *KCNE1* | 219 | A112G | S38G | rs1805127 |
| 172 | 7 | Months | Undetermined (Co-sleeping) | 11 | G | A | Heterozygous | *MYBPC3* | 256 | C2499T | A833V | RS3729952 |
| 172 | 7 | Months | Undetermined (Co-sleeping) | 3 | A | G | Homozygous | *SCN10A* | 6514 | T3218C | V1073A | rs6795970 |
| 173 | 6 | Months | Undetermined | 1 | G | A |  | *RYR2* | 1035 | G5656A | G1886S | rs3766871 |
| 173 | 6 | Months | Undetermined | 3 | T | C | Heterozygous | *SCN5A* | 1160161 | A1673G | H558R | rs1805124 |
| 173 | 6 | Months | Undetermined | 21 | T | C | Heterozygous | *KCNE1* | 219 | A112G | S38G | rs1805127 |
| 173 | 6 | Months | Undetermined | 3 | A | G | Heterozygous | *SCN10A* | 6514 | T3218C | V1073A | rs6795970 |
| 174 | 2 | Months | Undetermined (Co-sleeping) | 7 | T | G | Heterozygous | *KCNH2* | 172057 | A1670C | K557T | rs1805123 |
| 174 | 2 | Months | Undetermined (Co-sleeping) | 3 | T | C | Heterozygous | *SCN5A* | 1160161 | A1673G | H558R | rs1805124 |
| 174 | 2 | Months | Undetermined (Co-sleeping) | 21 | T | C | Heterozygous | *KCNE1* | 219 | A112G | S38G | rs1805127 |
| 174 | 2 | Months | Undetermined (Co-sleeping) | 3 | A | G | Homozygous | *SCN10A* | 6514 | T3218C | V1073A | rs6795970 |
| 175 | 2 | Months | SIDS | 18 | G | A | Heterozygous | *DSC2* | 24422 | C266T | S89L | rs141379407 |
| 175 | 2 | Months | SIDS | 7 | T | G | Heterozygous | *KCNH2* | 172057 | A1670C | K557T | rs1805123 |
| 175 | 2 | Months | SIDS | 21 | T | C | Homozygous | *KCNE1* | 219 | A112G | S38G | rs1805127 |
| 175 | 2 | Months | SIDS | 3 | A | G | Homozygous | *SCN10A* | 6514 | T3218C | V1073A | rs6795970 |
| 177 | 4 | Months | SIDS | 7 | T | G | Heterozygous | *KCNH2* | 172057 | A1670C | K557T | rs1805123 |
| 177 | 4 | Months | SIDS | 21 | T | C | Heterozygous | *KCNE1* | 219 | A112G | S38G | rs1805127 |
| 177 | 4 | Months | SIDS | 3 | A | G | Heterozygous | *SCN10A* | 6514 | T3218C | V1073A | rs6795970 |
| 178 | 3 | Months | Undetermined | 3 | T | C | Heterozygous | *SCN5A* | 1160160 | A1673G | H558R | rs1805124 |
| 178 | 3 | Months | Undetermined | 21 | T | C | Heterozygous | *KCNE1* | 219 | A112G | S38G | rs1805127 |
| 178 | 3 | Months | Undetermined | 3 | A | G | Homozygous | *SCN10A* | 6514 | T3218C | V1073A | rs6795970 |
| 178 | 3 | Months | Undetermined | 8 | G | A | Heterozygous | *KCNQ3* | 4519 | C1720T | P574S | rs74582884 |
| 179 | 1 | Months | Undetermined | 21 | T | C | Heterozygous | *KCNE1* | 219 | A112G | S38G | rs1805127 |
| 179 | 1 | Months | Undetermined | 3 | A | G | Heterozygous | *SCN10A* | 6514 | T3218C | V1073A | rs6795970 |
| 180 | 29 | Days | Undetermined (Co-sleeping) | 21 | T | C | Heterozygous | *KCNE1* | 219 | A112G | S38G | rs1805127 |
| 180 | 29 | Days | Undetermined (Co-sleeping) | 3 | A | G | Homozygous | *SCN10A* | 6514 | T3218C | V1073A | rs6795970 |
| 180 | 29 | Days | Undetermined (Co-sleeping) | 3 | G | T | Heterozygous | *SCN5A* | 198056 | C3308A | S1103Y | rs7626962 |
| 181 | 5 | Months | SIDS | 21 | T | C | Heterozygous | *KCNE1* | 219 | A112G | S38G | rs1805127 |
| 181 | 5 | Months | SIDS | 1 | G | A | Heterozygous | *RYR2* | 1035 | G5654A | G1885E | rs41315858 |
| 181 | 5 | Months | SIDS | 3 | A | G | Homozygous | *SCN10A* | 6514 | T3218C | V1073A | rs6795970 |
| 182 | 1 | Months | SIDS | 1 | G | A |  | *RYR2* | 1035 | G5656A | G1886S | rs3766871 |
| 182 | 1 | Months | SIDS | 7 | T | G | Heterozygous | *KCNH2* | 172057 | A1670C | K557T | rs1805123 |
| 182 | 1 | Months | SIDS | 21 | T | C | Heterozygous | *KCNE1* | 219 | A112G | S38G | rs1805127 |
| 182 | 1 | Months | SIDS | 3 | A | G | Homozygous | *SCN10A* | 6514 | T3218C | V1073A | rs6795970 |
| 183 | 2 | Months | Undetermined (Co-sleeping) | 3 | T | C | Homozygous | *SCN5A* | 1160160 | A1673G | H558R | rs1805124 |
| 183 | 2 | Months | Undetermined (Co-sleeping) | 3 | A | G | Homozygous | *SCN10A* | 6514 | T3218C | V1073A | rs6795970 |
| 184 | 6 | Weeks | Undetermined (Co-sleeping) | 21 | T | C | Homozygous | *KCNE1* | 219 | A112G | S38G | rs1805127 |
| 184 | 6 | Weeks | Undetermined (Co-sleeping) | 3 | A | G | Heterozygous | *SCN10A* | 6514 | T3218C | V1073A | rs6795970 |
| 185 | 4 | Months | SIDS | 3 | A | G | Homozygous | *SCN10A* | 6514 | T3218C | V1073A | rs6795970 |
| 186 | 1 | Months | SIDS | 7 | T | G | Heterozygous | *KCNH2* | 172057 | A1670C | K557T | rs1805123 |
| 186 | 1 | Months | SIDS | 3 | T | C | Heterozygous | *SCN5A* | 1160160 | A1673G | H558R | rs1805124 |
| 186 | 1 | Months | SIDS | 21 | T | C | Heterozygous | *KCNE1* | 219 | A112G | S38G | rs1805127 |
| 186 | 1 | Months | SIDS | 3 | A | G | Homozygous | *SCN10A* | 6514 | T3218C | V1073A | rs6795970 |
| 186 | 1 | Months | SIDS | 3 | G | T | Heterozygous | *SCN5A* | 198056 | C3308A | S1103Y | rs7626962 |
| 187 | 3 | Months | SIDS | 11 | G | C | Heterozygous | *MYBPC3* | 256 | C2993G | Q998E | rs11570112 |
| 187 | 3 | Months | SIDS | 10 | C | T | Heterozygous | *VCL* | 14000 | C2801T | A934V | rs16931179 |
| 187 | 3 | Months | SIDS | 3 | T | C | Heterozygous | *SCN5A* | 1160160 | A1673G | H558R | rs1805124 |
| 187 | 3 | Months | SIDS | 3 | A | G | Heterozygous | *SCN10A* | 6514 | T3218C | V1073A | rs6795970 |
| 188 | 3 | Months | Undetermined (Co-sleeping) | 3 | A | G | Homozygous | *SCN10A* | 6514 | T3218C | V1073A | rs6795970 |
| 189 | 5 | Months | SIDS | 3 | A | G | Homozygous | *SCN10A* | 6514 | T3218C | V1073A | rs6795970 |
| 190 | 4 | Months | SIDS | 21 | T | C | Homozygous | *KCNE1* | 219 | A112G | S38G | rs1805127 |
| 191 | 1 | Months | Undetermined (Co-sleeping) | 3 | A | G | Heterozygous | *SCN10A* | 6514 | T3218C | V1073A | rs6795970 |
| 193 | 2 | Months | SIDS | 1 | G | A |  | *RYR2* | 1035 | G5656A | G1886S | rs3766871 |
| 193 | 2 | Months | SIDS | 3 | T | C | Homozygous | *SCN5A* | 1160161 | A1673G | H558R | rs1805124 |
| 193 | 2 | Months | SIDS | 21 | T | C | Heterozygous | *KCNE1* | 219 | A112G | S38G | rs1805127 |
| 193 | 2 | Months | SIDS | 3 | A | G | Homozygous | *SCN10A* | 6514 | T3218C | V1073A | rs6795970 |
| 194 | 6 | Months | Undetermined (Co-sleeping) | 3 | A | G | Homozygous | *SCN10A* | 6514 | T3218C | V1073A | rs6795970 |
| 195 | 1 | Months | Undetermined (Co-sleeping) | 11 | G | C | Heterozygous | *MYBPC3* | 256 | C2993G | Q998E | rs11570112 |
| 195 | 1 | Months | Undetermined (Co-sleeping) | 21 | T | C | Homozygous | *KCNE1* | 219 | A112G | S38G | rs1805127 |
| 195 | 1 | Months | Undetermined (Co-sleeping) | 3 | G | A | Heterozygous | *SCN5A* | 1160161 | C3206T | T1069M | rs199473187 |
| 195 | 1 | Months | Undetermined (Co-sleeping) | 6 | A | T | Heterozygous | *DSP* | 1008844 | A1481T | Y494F | rs28763961 |
| 195 | 1 | Months | Undetermined (Co-sleeping) | 3 | A | G | Homozygous | *SCN10A* | 6514 | T3218C | V1073A | rs6795970 |
| 196 | 2 | Months | Undetermined | 7 | T | G | Heterozygous | *KCNH2* | 172057 | A1670C | K557T | rs1805123 |
| 196 | 2 | Months | Undetermined | 3 | T | C | Homozygous | *SCN5A* | 1160161 | A1673G | H558R | rs1805124 |
| 196 | 2 | Months | Undetermined | 21 | T | C | Heterozygous | *KCNE1* | 219 | A112G | S38G | rs1805127 |
| 196 | 2 | Months | Undetermined | 3 | A | G | Heterozygous | *SCN10A* | 6514 | T3218C | V1073A | rs6795970 |
| 197 | 1 | Months | Undetermined | 3 | T | C | Homozygous | *SCN5A* | 1160161 | A1673G | H558R | rs1805124 |
| 197 | 1 | Months | Undetermined | 21 | T | C | Homozygous | *KCNE1* | 219 | A112G | S38G | rs1805127 |
| 197 | 1 | Months | Undetermined | 3 | A | G | Homozygous | *SCN10A* | 6514 | T3218C | V1073A | rs6795970 |
| 198 | 5 | Months | Undetermined (Co-sleeping) | 21 | T | C | Homozygous | *KCNE1* | 219 | A112G | S38G | rs1805127 |
| 198 | 5 | Months | Undetermined (Co-sleeping) | 4 | C | A | Heterozygous | *ANK2* | 1148 | C11218A | L3740I (L1622I) | rs35530544 |
| 198 | 5 | Months | Undetermined (Co-sleeping) | 3 | A | G | Homozygous | *SCN10A* | 6514 | T3218C | V1073A | rs6795970 |
| 199 | 8 | Months | Undetermined | 1 | G | A |  | *RYR2* | 1035 | G5656A | G1886S | rs3766871 |
| 199 | 8 | Months | Undetermined | 21 | T | C | Homozygous | *KCNE1* | 219 | A112G | S38G | rs1805127 |
| 199 | 8 | Months | Undetermined | 3 | A | G | Homozygous | *SCN10A* | 6514 | T3218C | V1073A | rs6795970 |
| 200 | 2 | Months | Undetermined (Co-sleeping) | 7 | T | G | Heterozygous | *KCNH2* | 172057 | A1670C | K557T | rs1805123 |
| 200 | 2 | Months | Undetermined (Co-sleeping) | 21 | T | C | Heterozygous | *KCNE1* | 219 | A112G | S38G | rs1805127 |
| 200 | 2 | Months | Undetermined (Co-sleeping) | 1 | G | A | Heterozygous | *RYR2* | 1035 | G5654A | G1885E | rs41315858 |
| 200 | 2 | Months | Undetermined (Co-sleeping) | 3 | A | G | Homozygous | *SCN10A* | 6514 | T3218C | V1073A | rs6795970 |
| 201 | 1 | Months | SIDS | 3 | T | C | Heterozygous | *SCN5A* | 1160161 | A1673G | H558R | rs1805124 |
| 201 | 1 | Months | SIDS | 21 | T | C | Heterozygous | *KCNE1* | 219 | A112G | S38G | rs1805127 |
| 201 | 1 | Months | SIDS | 4 | C | A | Homozygous | *ANK2* | 1148 | C11218A | L3740I (L1622I) | rs35530544 |
| 201 | 1 | Months | SIDS | 3 | A | G | Homozygous | *SCN10A* | 6514 | T3218C | V1073A | rs6795970 |
| 204 | 1 | Months | Undetermined (Co-sleeping) | 1 | G | A |  | *RYR2* | 1035 | G5656A | G1886S | rs3766871 |
| 204 | 1 | Months | Undetermined (Co-sleeping) | 21 | T | C | Homozygous | *KCNE1* | 219 | A112G | S38G | rs1805127 |
| 204 | 1 | Months | Undetermined (Co-sleeping) | 3 | A | G | Homozygous | *SCN10A* | 6514 | T3218C | V1073A | rs6795970 |
| 204 | 1 | Months | Undetermined (Co-sleeping) | 3 | G | T | Heterozygous | *SCN5A* | 198056 | C3308A | S1103Y | rs7626962 |
| 205 | 1 | Months | Undetermined (Co-sleeping) | 21 | T | C | Heterozygous | *KCNE1* | 219 | A112G | S38G | rs1805127 |
| 206 | 2 | Months | Undetermined (Co-sleeping) | 21 | T | C | Heterozygous | *KCNE1* | 219 | A112G | S38G | rs1805127 |
| 206 | 2 | Months | Undetermined (Co-sleeping) | 1 | C | T | Heterozygous | *LMNA* | 170708 | C1201T | R401C | rs61094188 |
| 206 | 2 | Months | Undetermined (Co-sleeping) | 3 | A | G | Heterozygous | *SCN10A* | 6514 | T3218C | V1073A | rs6795970 |
| 208 | 11 | Months | Undetermined | 3 | G | A | Heterozygous | *SCN5A* | 198056 | C1441T | R481W | rs144511230 |
| 208 | 11 | Months | Undetermined | 7 | T | G | Heterozygous | *KCNH2* | 172057 | A1670C | K557T | rs1805123 |
| 208 | 11 | Months | Undetermined | 3 | T | C | Heterozygous | *SCN5A* | 1160161 | A1673G | H558R | rs1805124 |
| 208 | 11 | Months | Undetermined | 21 | T | C | Homozygous | *KCNE1* | 219 | A112G | S38G | rs1805127 |
| 208 | 11 | Months | Undetermined | 11 | C | T | Heterozygous | *MYBPC3* | 256 | G530A | R177H | rs201012766 |
| 208 | 11 | Months | Undetermined | 10 | A | G | Heterozygous | *LDB3* | 7078 | A752G | K251R | rs34423165 |
| 208 | 11 | Months | Undetermined | 3 | G | T | Heterozygous | *SCN5A* | 198056 | C1571A | S524Y | rs41313691 |
| 208 | 11 | Months | Undetermined | 3 | A | G | Homozygous | *SCN10A* | 6514 | T3218C | V1073A | rs6795970 |
| 209 | 1 | Months | SIDS | 3 | T | C | Heterozygous | *SCN5A* | 1160161 | A1673G | H558R | rs1805124 |
| 209 | 1 | Months | SIDS | 21 | T | C | Homozygous | *KCNE1* | 219 | A112G | S38G | rs1805127 |
| 209 | 1 | Months | SIDS | 3 | A | G | Homozygous | *SCN10A* | 6514 | T3218C | V1073A | rs6795970 |
| 210 | 3 | Months | Undetermined | 3 | T | C | Heterozygous | *SCN5A* | 1160161 | A1673G | H558R | rs1805124 |
| 210 | 3 | Months | Undetermined | 3 | A | G | Heterozygous | *SCN10A* | 6514 | T3218C | V1073A | rs6795970 |
| 211 | 1 | Months | Undetermined (Co-sleeping) | 7 | T | G | Heterozygous | *KCNH2* | 172057 | A1670C | K557T | rs1805123 |
| 211 | 1 | Months | Undetermined (Co-sleeping) | 3 | T | C | Heterozygous | *SCN5A* | 198056 | A1673G | H558R | rs1805124 |
| 211 | 1 | Months | Undetermined (Co-sleeping) | 21 | T | C | Homozygous | *KCNE1* | 219 | A112G | S38G | rs1805127 |
| 212 | 2 | Months | Undetermined (Co-sleeping) | 1 | G | A |  | *RYR2* | 1035 | G5656A | G1886S | rs3766871 |
| 212 | 2 | Months | Undetermined (Co-sleeping) | 17 | A | G | Heterozygous | *MYH3* | 2470 | T1411C | Y471H | rs115742228 |
| 212 | 2 | Months | Undetermined (Co-sleeping) | 21 | T | C | Homozygous | *KCNE1* | 219 | A112G | S38G | rs1805127 |
| 212 | 2 | Months | Undetermined (Co-sleeping) | 3 | A | G | Homozygous | *SCN10A* | 6514 | T3218C | V1073A | rs6795970 |
| 213 | 2 | Months | Undetermined (Co-sleeping) | 11 | G | C | Heterozygous | *MYBPC3* | 256 | C2993G | Q998E | rs11570112 |
| 213 | 2 | Months | Undetermined (Co-sleeping) | 21 | T | C | Heterozygous | *KCNE1* | 219 | A112G | S38G | rs1805127 |
| 213 | 2 | Months | Undetermined (Co-sleeping) | 3 | A | G | Homozygous | *SCN10A* | 6514 | T3218C | V1073A | rs6795970 |
| 214 | 3 | Months | Undetermined (Co-sleeping) | 3 | T | C | Heterozygous | *SCN5A* | 198056 | A1673G | H558R | rs1805124 |
| 214 | 3 | Months | Undetermined (Co-sleeping) | 21 | T | C | Heterozygous | *KCNE1* | 219 | A112G | S38G | rs1805127 |
| 214 | 3 | Months | Undetermined (Co-sleeping) | 3 | A | G | Heterozygous | *SCN10A* | 6514 | T3218C | V1073A | rs6795970 |
| 220 | 2 | Months | SIDS | 7 | T | G | Heterozygous | *KCNH2* | 172057 | A1670C | K557T | rs1805123 |
| 220 | 2 | Months | SIDS | 21 | T | C | Homozygous | *KCNE1* | 219 | A112G | S38G | rs1805127 |
| 220 | 2 | Months | SIDS | 3 | C | A | Heterozygous | *SCN5A* | 1160161 | G5851T | V1951L | rs41315493 |
| 220 | 2 | Months | SIDS | 3 | A | G | Heterozygous | *SCN10A* | 6514 | T3218C | V1073A | rs6795970 |
| 221 | 4 | Months | SIDS | 3 | T | C | Heterozygous | *SCN5A* | 1160161 | A1673G | H558R | rs1805124 |
| 221 | 4 | Months | SIDS | 21 | T | C | Homozygous | *KCNE1* | 219 | A112G | S38G | rs1805127 |
| 221 | 4 | Months | SIDS | 3 | A | G | Homozygous | *SCN10A* | 6514 | T3218C | V1073A | rs6795970 |
| 221 | 4 | Months | SIDS | 3 | G | T | Heterozygous | *SCN5A* | 198056 | C3308A | S1103Y | rs7626962 |
| 222 | 8 | Months | SIDS | 3 | C | A | Heterozygous | *SCN5A* | 1160161 | G5851T | V1951L | rs41315493 |
| 222 | 8 | Months | SIDS | 3 | A | G | Heterozygous | *SCN10A* | 6514 | T3218C | V1073A | rs6795970 |
| 223 | 6 | Months | SIDS | 1 | G | A | Heterozygous | *RYR2* | 1035 | G5654A | G1885E | rs41315858 |
| 223 | 6 | Months | SIDS | 3 | A | G | Heterozygous | *SCN10A* | 6514 | T3218C | V1073A | rs6795970 |
| 224 | 2 | Months | Undetermined (Co-sleeping) | 21 | T | C | Homozygous | *KCNE1* | 219 | A112G | S38G | rs1805127 |
| 224 | 2 | Months | Undetermined (Co-sleeping) | 3 | A | G | Heterozygous | *SCN10A* | 6514 | T3218C | V1073A | rs6795970 |
| 225 | 2 | Months | SIDS | 1 | G | A |  | *RYR2* | 1035 | G5656A | G1886S | rs3766871 |
| 225 | 2 | Months | SIDS | 3 | T | C | Heterozygous | *SCN5A* | 1160161 | A1673G | H558R | rs1805124 |
| 225 | 2 | Months | SIDS | 21 | T | C | Homozygous | *KCNE1* | 219 | A112G | S38G | rs1805127 |
| 225 | 2 | Months | SIDS | 3 | A | G | Homozygous | *SCN10A* | 6514 | T3218C | V1073A | rs6795970 |
| 226 | 2 | Months | SIDS | 21 | T | C | Heterozygous | *KCNE1* | 219 | A112G | S38G | rs1805127 |
| 226 | 2 | Months | SIDS | 3 | A | G | Homozygous | *SCN10A* | 6514 | T3218C | V1073A | rs6795970 |
| 227 | 3 | Months | Undetermined (Co-sleeping) | 21 | T | C | Heterozygous | *KCNE1* | 219 | A112G | S38G | rs1805127 |
| 227 | 3 | Months | Undetermined (Co-sleeping) | 4 | C | A | Heterozygous | *ANK2* | 1148 | C11218A | L3740I (L1622I) | rs35530544 |
| 227 | 3 | Months | Undetermined (Co-sleeping) | 3 | A | G | Homozygous | *SCN10A* | 6514 | T3218C | V1073A | rs6795970 |
| 228 | 1 | Months | Undetermined | 21 | T | C | Homozygous | *KCNE1* | 219 | A112G | S38G | rs1805127 |
| 228 | 1 | Months | Undetermined | 3 | A | G | Homozygous | *SCN10A* | 6514 | T3218C | V1073A | rs6795970 |
| 228 | 1 | Months | Undetermined | 3 | G | T | Heterozygous | *SCN5A* | 198056 | C3308A | S1103Y | rs7626962 |
| 230 | 4 | Months | SIDS | 21 | T | C | Heterozygous | *KCNE1* | 219 | A112G | S38G | rs1805127 |
| 230 | 4 | Months | SIDS | 3 | A | G | Homozygous | *SCN10A* | 6514 | T3218C | V1073A | rs6795970 |
| 231 | 4 | Months | SIDS | 7 | T | G | Heterozygous | *KCNH2* | 172057 | A1670C | K557T | rs1805123 |
| 231 | 4 | Months | SIDS | 3 | T | C | Heterozygous | *SCN5A* | 1160161 | A1673G | H558R | rs1805124 |
| 231 | 4 | Months | SIDS | 21 | T | C | Heterozygous | *KCNE1* | 219 | A112G | S38G | rs1805127 |
| 231 | 4 | Months | SIDS | 3 | A | G | Homozygous | *SCN10A* | 6514 | T3218C | V1073A | rs6795970 |
| 232 | 3 | Months | Undetermined (Co-sleeping) | 10 | G | A | Heterozygous | *LDB3* | 1080114 | G1130A | R377H | rs146265188 |
| 232 | 3 | Months | Undetermined (Co-sleeping) | 3 | T | C | Heterozygous | *SCN5A* | 1160161 | A1673G | H558R | rs1805124 |
| 232 | 3 | Months | Undetermined (Co-sleeping) | 21 | T | C | Homozygous | *KCNE1* | 219 | A112G | S38G | rs1805127 |
| 232 | 3 | Months | Undetermined (Co-sleeping) | 10 | A | G | Heterozygous | *LDB3* | 7078 | A752G | K251R | rs34423165 |
| 232 | 3 | Months | Undetermined (Co-sleeping) | 3 | A | G | Homozygous | *SCN10A* | 6514 | T3218C | V1073A | rs6795970 |
| 233 | 4 | Months | SIDS | 21 | T | C | Homozygous | *KCNE1* | 219 | A112G | S38G | rs1805127 |
| 233 | 4 | Months | SIDS | 3 | A | G | Heterozygous | *SCN10A* | 6514 | T3218C | V1073A | rs6795970 |
| 234 | 5 | Months | Undetermined | 7 | T | G | Homozygous | *KCNH2* | 172057 | A1670C | K557T | rs1805123 |
| 234 | 5 | Months | Undetermined | 3 | T | C | Heterozygous | *SCN5A* | 1160161 | A1673G | H558R | rs1805124 |
| 234 | 5 | Months | Undetermined | 3 | A | G | Homozygous | *SCN10A* | 6514 | T3218C | V1073A | rs6795970 |
| 235 | 2 | Months | Undetermined (Co-sleeping) | 3 | A | G | Heterozygous | *SCN10A* | 6514 | T3218C | V1073A | rs6795970 |
| 236 | 3 | Months | SIDS | 3 | A | G | Homozygous | *SCN10A* | 6514 | T3218C | V1073A | rs6795970 |
| 237 | 2 | Months | Undetermined (Co-sleeping) | 1 | G | A |  | *RYR2* | 1035 | G5656A | G1886S | rs3766871 |
| 237 | 2 | Months | Undetermined (Co-sleeping) | 3 | T | C | Heterozygous | *SCN5A* | 1160161 | A1673G | H558R | rs1805124 |
| 237 | 2 | Months | Undetermined (Co-sleeping) | 21 | T | C | Heterozygous | *KCNE1* | 219 | A112G | S38G | rs1805127 |
| 237 | 2 | Months | Undetermined (Co-sleeping) | 3 | A | G | Homozygous | *SCN10A* | 6514 | T3218C | V1073A | rs6795970 |
| 237 | 2 | Months | Undetermined (Co-sleeping) | 1 | A | G | Heterozygous | *ACADM* | 16 | A985G | K329E | rs77931234 |
| 239 | 1 | Months | Undetermined | 21 | T | C | Homozygous | *KCNE1* | 219 | A112G | S38G | rs1805127 |
| 239 | 1 | Months | Undetermined | 3 | A | G | Homozygous | *SCN10A* | 6514 | T3218C | V1073A | rs6795970 |
| 240 | 30 | Days | Undetermined (Co-sleeping) | 1 | G | A |  | *RYR2* | 1035 | G5656A | G1886S | rs3766871 |
| 240 | 30 | Days | Undetermined (Co-sleeping) | 3 | T | C | Heterozygous | *SCN5A* | 1160161 | A1673G | H558R | rs1805124 |
| 240 | 30 | Days | Undetermined (Co-sleeping) | 21 | T | C | Homozygous | *KCNE1* | 219 | A112G | S38G | rs1805127 |
| 240 | 30 | Days | Undetermined (Co-sleeping) | 3 | A | G | Homozygous | *SCN10A* | 6514 | T3218C | V1073A | rs6795970 |
| 241 | 2 | Months | SIDS | 3 | T | C | Heterozygous | *SCN5A* | 1160161 | A1673G | H558R | rs1805124 |
| 241 | 2 | Months | SIDS | 21 | T | C | Heterozygous | *KCNE1* | 219 | A112G | S38G | rs1805127 |
| 242 | 7 | Months | Undetermined (Co-sleeping) | 21 | T | C | Heterozygous | *KCNE1* | 219 | A112G | S38G | rs1805127 |
| 242 | 7 | Months | Undetermined (Co-sleeping) | 3 | A | G | Homozygous | *SCN10A* | 6514 | T3218C | V1073A | rs6795970 |
| 242 | 7 | Months | Undetermined (Co-sleeping) | 3 | G | T | Heterozygous | *SCN5A* | 198056 | C3308A | S1103Y | rs7626962 |
| 243 | 1 | Months | Undetermined (Co-sleeping) | 3 | T | C | Heterozygous | *SCN5A* | 1160160 | A1673G | H558R | rs1805124 |
| 243 | 1 | Months | Undetermined (Co-sleeping) | 21 | T | C | Homozygous | *KCNE1* | 219 | A112G | S38G | rs1805127 |
| 243 | 1 | Months | Undetermined (Co-sleeping) | 3 | A | G | Heterozygous | *SCN10A* | 6514 | T3218C | V1073A | rs6795970 |
| 244 | 4 | Months | SIDS | 21 | T | C | Homozygous | *KCNE1* | 219 | A112G | S38G | rs1805127 |
| 244 | 4 | Months | SIDS | 3 | A | G | Homozygous | *SCN10A* | 6514 | T3218C | V1073A | rs6795970 |
| 245 | 2 | Months | Undetermined | 6 | G | A | Heterozygous | *DSP* | 4415 | G5218A | E1740K | rs142885240 |
| 245 | 2 | Months | Undetermined | 10 | C | T | Heterozygous | *VCL* | 14000 | C2801T | A934V | rs16931179 |
| 245 | 2 | Months | Undetermined | 3 | A | G | Heterozygous | *SCN10A* | 6514 | T3218C | V1073A | rs6795970 |
| 246 | 5 | Weeks | Undetermined (Co-sleeping) | 10 | C | T | Heterozygous | *VCL* | 14000 | C2801T | A934V | rs16931179 |
| 246 | 5 | Weeks | Undetermined (Co-sleeping) | 3 | T | C | Heterozygous | *SCN5A* | 1160160 | A1673G | H558R | rs1805124 |
| 249 | 3 | Months | SIDS | 3 | T | C | Heterozygous | *SCN5A* | 1160161 | A1673G | H558R | rs1805124 |
| 249 | 3 | Months | SIDS | 21 | T | C | Homozygous | *KCNE1* | 219 | A112G | S38G | rs1805127 |
| 249 | 3 | Months | SIDS | 3 | A | G | Homozygous | *SCN10A* | 6514 | T3218C | V1073A | rs6795970 |
| 250 | 3 | Months | Undetermined (Co-sleeping) | 21 | T | C | Heterozygous | *KCNE1* | 219 | A112G | S38G | rs1805127 |
| 250 | 3 | Months | Undetermined (Co-sleeping) | 3 | A | G | Homozygous | *SCN10A* | 6514 | T3218C | V1073A | rs6795970 |
| 251 | 3 | Months | Undetermined (Co-sleeping) | 7 | T | G | Heterozygous | *KCNH2* | 172057 | A1670C | K557T | rs1805123 |
| 251 | 3 | Months | Undetermined (Co-sleeping) | 21 | T | C | Heterozygous | *KCNE1* | 219 | A112G | S38G | rs1805127 |
| 251 | 3 | Months | Undetermined (Co-sleeping) | 3 | C | A | Heterozygous | *SCN5A* | 1160161 | G5851T | V1951L | rs41315493 |
| 251 | 3 | Months | Undetermined (Co-sleeping) | 3 | A | G | Heterozygous | *SCN10A* | 6514 | T3218C | V1073A | rs6795970 |
| 252 | 4 | Months | SIDS | 7 | T | G | Heterozygous | *KCNH2* | 172057 | A1670C | K557T | rs1805123 |
| 252 | 4 | Months | SIDS | 3 | T | C | Homozygous | *SCN5A* | 1160161 | A1673G | H558R | rs1805124 |
| 252 | 4 | Months | SIDS | 21 | T | C | Heterozygous | *KCNE1* | 219 | A112G | S38G | rs1805127 |
| 252 | 4 | Months | SIDS | 3 | A | G | Homozygous | *SCN10A* | 6514 | T3218C | V1073A | rs6795970 |
| 253 | 3 | Months | Undetermined | 21 | T | C | Homozygous | *KCNE1* | 219 | A112G | S38G | rs1805127 |
| 253 | 3 | Months | Undetermined | 3 | A | G | Heterozygous | *SCN5A* | 198056 | T5507C | I1836T | rs45563942 |
| 253 | 3 | Months | Undetermined | 3 | A | G | Heterozygous | *SCN10A* | 6514 | T3218C | V1073A | rs6795970 |
| 254 | 3 | Months | SIDS | 7 | T | G | Heterozygous | *KCNH2* | 172057 | A1670C | K557T | rs1805123 |
| 254 | 3 | Months | SIDS | 3 | T | C | Heterozygous | *SCN5A* | 1160161 | A1673G | H558R | rs1805124 |
| 254 | 3 | Months | SIDS | 21 | T | C | Homozygous | *KCNE1* | 219 | A112G | S38G | rs1805127 |
| 254 | 3 | Months | SIDS | 3 | A | G | Heterozygous | *SCN10A* | 6514 | T3218C | V1073A | rs6795970 |
| 255 | 2 | Months | Undetermined | 21 | T | C | Heterozygous | *KCNE1* | 219 | A112G | S38G | rs1805127 |
| 256 | 1 | Months | Undetermined (Co-sleeping) | 3 | T | C | Heterozygous | *SCN5A* | 1160161 | A1673G | H558R | rs1805124 |
| 256 | 1 | Months | Undetermined (Co-sleeping) | 21 | T | C | Homozygous | *KCNE1* | 219 | A112G | S38G | rs1805127 |
| 256 | 1 | Months | Undetermined (Co-sleeping) | 3 | A | G | Heterozygous | *SCN10A* | 6514 | T3218C | V1073A | rs6795970 |
| 257 | 3 | Months | SIDS | 7 | T | G | Heterozygous | *KCNH2* | 172057 | A1670C | K557T | rs1805123 |
| 257 | 3 | Months | SIDS | 3 | T | C | Homozygous | *SCN5A* | 1160161 | A1673G | H558R | rs1805124 |
| 257 | 3 | Months | SIDS | 21 | T | C | Heterozygous | *KCNE1* | 219 | A112G | S38G | rs1805127 |
| 257 | 3 | Months | SIDS | 3 | A | G | Homozygous | *SCN10A* | 6514 | T3218C | V1073A | rs6795970 |
| 258 | 5 | Months | SIDS | 21 | T | C | Heterozygous | *KCNE1* | 219 | A112G | S38G | rs1805127 |
| 258 | 5 | Months | SIDS | 3 | A | G | Homozygous | *SCN10A* | 6514 | T3218C | V1073A | rs6795970 |
| 259 | 2 | Months | Undetermined (Co-sleeping) | 7 | T | G | Heterozygous | *KCNH2* | 172057 | A1670C | K557T | rs1805123 |
| 259 | 2 | Months | Undetermined (Co-sleeping) | 3 | T | C | Homozygous | *SCN5A* | 1160161 | A1673G | H558R | rs1805124 |
| 259 | 2 | Months | Undetermined (Co-sleeping) | 21 | T | C | Heterozygous | *KCNE1* | 219 | A112G | S38G | rs1805127 |
| 259 | 2 | Months | Undetermined (Co-sleeping) | 3 | A | G | Heterozygous | *SCN10A* | 6514 | T3218C | V1073A | rs6795970 |
| 261 | 3 | Months | Undetermined (Co-sleeping) | 21 | T | C | Homozygous | *KCNE1* | 219 | A112G | S38G | rs1805127 |
| 261 | 3 | Months | Undetermined (Co-sleeping) | 3 | A | G | Homozygous | *SCN10A* | 6514 | T3218C | V1073A | rs6795970 |
| 262 | 5 | Months | Undetermined (Co-sleeping) | 3 | T | C | Homozygous | *SCN5A* | 1160161 | A1673G | H558R | rs1805124 |
| 262 | 5 | Months | Undetermined (Co-sleeping) | 21 | T | C | Heterozygous | *KCNE1* | 219 | A112G | S38G | rs1805127 |
| 262 | 5 | Months | Undetermined (Co-sleeping) | 11 | G | A | Heterozygous | *MYBPC3* | 256 | C2499T | A833V | RS3729952 |
| 262 | 5 | Months | Undetermined (Co-sleeping) | 3 | A | G | Homozygous | *SCN10A* | 6514 | T3218C | V1073A | rs6795970 |
| 263 | 2 | Months | SIDS | 1 | G | A |  | *RYR2* | 1035 | G5656A | G1886S | rs3766871 |
| 263 | 2 | Months | SIDS | 10 | G | A | Heterozygous | *LDB3* | 1171611 | G349A | D117N | rs121908338 |
| 263 | 2 | Months | SIDS | 21 | T | C | Heterozygous | *KCNE1* | 219 | A112G | S38G | rs1805127 |
| 263 | 2 | Months | SIDS | 3 | G | A | Heterozygous | *SCN5A* | 198056 | C1910T | P637L | rs199473135 |
| 263 | 2 | Months | SIDS | 3 | A | G | Heterozygous | *SCN10A* | 6514 | T3218C | V1073A | rs6795970 |
| 263 | 2 | Months | SIDS | 3 | G | T | Heterozygous | *SCN5A* | 198056 | C3308A | S1103Y | rs7626962 |
| 264 | 1 | Months | Undetermined | 7 | T | G | Homozygous | *KCNH2* | 172057 | A1670C | K557T | rs1805123 |
| 264 | 1 | Months | Undetermined | 3 | T | C | Heterozygous | *SCN5A* | 1160161 | A1673G | H558R | rs1805124 |
| 264 | 1 | Months | Undetermined | 3 | A | G | Homozygous | *SCN10A* | 6514 | T3218C | V1073A | rs6795970 |
| 265 | 1 | Months | SIDS | 7 | T | G | Heterozygous | *KCNH2* | 172057 | A1670C | K557T | rs1805123 |
| 265 | 1 | Months | SIDS | 21 | T | C | Heterozygous | *KCNE1* | 219 | A112G | S38G | rs1805127 |
| 265 | 1 | Months | SIDS | 3 | A | G | Heterozygous | *SCN10A* | 6514 | T3218C | V1073A | rs6795970 |
| 265 | 1 | Months | SIDS | 3 | G | T | Heterozygous | *SCN5A* | 198056 | C3308A | S1103Y | rs7626962 |
| 266 | 2 | Months | SIDS | 21 | T | C | Heterozygous | *KCNE1* | 219 | A112G | S38G | rs1805127 |
| 266 | 2 | Months | SIDS | 6 | C | G | Heterozygous | *DSP* | 4415 | C4372G | R1458G | rs28763965 |
| 266 | 2 | Months | SIDS | 3 | A | G | Homozygous | *SCN10A* | 6514 | T3218C | V1073A | rs6795970 |
| 267 | 1 | Months | SIDS | 1 | G | A |  | *RYR2* | 1035 | G5656A | G1886S | rs3766871 |
| 267 | 1 | Months | SIDS | 21 | T | C | Homozygous | *KCNE1* | 219 | A112G | S38G | rs1805127 |
| 267 | 1 | Months | SIDS | 3 | G | T | Heterozygous | *SCN5A* | 198056 | C1571A | S524Y | rs41313691 |
| 267 | 1 | Months | SIDS | 3 | A | G | Homozygous | *SCN10A* | 6514 | T3218C | V1073A | rs6795970 |
| 267 | 1 | Months | SIDS | 3 | C | T | Heterozygous | *CAV3* | 1234 | C233T | T78M | rs72546668 |
| 268 | 1 | Months | SIDS | 1 | G | A |  | *RYR2* | 1035 | G5656A | G1886S | rs3766871 |
| 268 | 1 | Months | SIDS | 7 | T | G | Heterozygous | *KCNH2* | 172057 | A1670C | K557T | rs1805123 |
| 268 | 1 | Months | SIDS | 3 | A | G | Heterozygous | *SCN10A* | 6514 | T3218C | V1073A | rs6795970 |
| 269 | 1 | Months | Undetermined (Co-sleeping) | 3 | A | G | Heterozygous | *SCN10A* | 6514 | T3218C | V1073A | rs6795970 |
| 270 | 4 | Months | SIDS | 3 | T | C | Heterozygous | *SCN5A* | 1160161 | A1673G | H558R | rs1805124 |
| 270 | 4 | Months | SIDS | 21 | T | C | Heterozygous | *KCNE1* | 219 | A112G | S38G | rs1805127 |
| 270 | 4 | Months | SIDS | 10 | A | G | Heterozygous | *LDB3* | 7078 | A752G | K251R | rs34423165 |
| 270 | 4 | Months | SIDS | 11 | C | T | Heterozygous | *MYBPC3* | 256 | G1520A | G507R | rs35736435 |
| 270 | 4 | Months | SIDS | 3 | A | G | Homozygous | *SCN10A* | 6514 | T3218C | V1073A | rs6795970 |
| 271 | 1 | Months | Undetermined (Co-sleeping) | 1 | G | A |  | *RYR2* | 1035 | G5656A | G1886S | rs3766871 |
| 271 | 1 | Months | Undetermined (Co-sleeping) | 3 | T | C | Heterozygous | *SCN5A* | 1160161 | A1673G | H558R | rs1805124 |
| 271 | 1 | Months | Undetermined (Co-sleeping) | 4 | C | A | Heterozygous | *ANK2* | 1148 | C11218A | L3740I (L1622I) | rs35530544 |
| 271 | 1 | Months | Undetermined (Co-sleeping) | 3 | A | G | Homozygous | *SCN10A* | 6514 | T3218C | V1073A | rs6795970 |
| 272 | 2 | Months | Undetermined (Co-sleeping) | 21 | T | C | Homozygous | *KCNE1* | 219 | A112G | S38G | rs1805127 |
| 272 | 2 | Months | Undetermined (Co-sleeping) | 6 | A | T | Heterozygous | *DSP* | 1008844 | A1481T | Y494F | rs28763961 |
| 272 | 2 | Months | Undetermined (Co-sleeping) | 3 | A | G | Homozygous | *SCN10A* | 6514 | T3218C | V1073A | rs6795970 |
| 273 | 11 | Months | Undetermined (Co-sleeping) | 21 | T | C | Heterozygous | *KCNE1* | 219 | A112G | S38G | rs1805127 |
| 273 | 11 | Months | Undetermined (Co-sleeping) | 10 | A | G | Heterozygous | *LDB3* | 7078 | A752G | K251R | rs34423165 |
| 273 | 11 | Months | Undetermined (Co-sleeping) | 3 | A | G | Heterozygous | *SCN10A* | 6514 | T3218C | V1073A | rs6795970 |
| 274 | 3 | Months | Undetermined (Co-sleeping) | 3 | T | C | Heterozygous | *SCN5A* | 1160161 | A1673G | H558R | rs1805124 |
| 274 | 3 | Months | Undetermined (Co-sleeping) | 21 | T | C | Homozygous | *KCNE1* | 219 | A112G | S38G | rs1805127 |
| 274 | 3 | Months | Undetermined (Co-sleeping) | 10 | A | G | Heterozygous | *LDB3* | 7078 | A752G | K251R | rs34423165 |
| 274 | 3 | Months | Undetermined (Co-sleeping) | 11 | G | A | Heterozygous | *MYBPC3* | 256 | C2499T | A833V | RS3729952 |
| 274 | 3 | Months | Undetermined (Co-sleeping) | 3 | A | G | Heterozygous | *SCN10A* | 6514 | T3218C | V1073A | rs6795970 |
| 274 | 3 | Months | Undetermined (Co-sleeping) | 3 | G | T | Heterozygous | *SCN5A* | 198056 | C3308A | S1103Y | rs7626962 |
| 275 | 6 | Weeks | Undetermined (Co-sleeping) | 3 | T | C | Heterozygous | *SCN5A* | 1160161 | A1673G | H558R | rs1805124 |
| 275 | 6 | Weeks | Undetermined (Co-sleeping) | 21 | T | C | Heterozygous | *KCNE1* | 219 | A112G | S38G | rs1805127 |
| 275 | 6 | Weeks | Undetermined (Co-sleeping) | 3 | A | G | Homozygous | *SCN10A* | 6514 | T3218C | V1073A | rs6795970 |
| 276 | 2 | Months | SIDS | 21 | T | C | Homozygous | *KCNE1* | 219 | A112G | S38G | rs1805127 |
| 276 | 2 | Months | SIDS | 3 | A | G | Heterozygous | *SCN10A* | 6514 | T3218C | V1073A | rs6795970 |
| 277 | 6 | Months | SIDS | 3 | T | C | Heterozygous | *SCN5A* | 1160161 | A1673G | H558R | rs1805124 |
| 277 | 6 | Months | SIDS | 21 | T | C | Homozygous | *KCNE1* | 219 | A112G | S38G | rs1805127 |
| 277 | 6 | Months | SIDS | 19 | G | A | Heterozygous | *SCN1B* | 199037 | G641A | R214Q | rs66876876 |
| 277 | 6 | Months | SIDS | 3 | A | G | Heterozygous | *SCN10A* | 6514 | T3218C | V1073A | rs6795970 |
| 278 | 1 | Months | Undetermined (Co-sleeping) | 10 | C | A | Heterozygous | *ANKRD1* | 14391 | G319T | V107L | rs114435632 |
| 278 | 1 | Months | Undetermined (Co-sleeping) | 21 | T | C | Homozygous | *KCNE1* | 219 | A112G | S38G | rs1805127 |
| 278 | 1 | Months | Undetermined (Co-sleeping) | 3 | A | G | Homozygous | *SCN10A* | 6514 | T3218C | V1073A | rs6795970 |
| 280 | 2 | Months | Undetermined (Co-sleeping) | 3 | C | A | Heterozygous | *SCN5A* | 1160161 | G5851T | V1951L | rs41315493 |
| 280 | 2 | Months | Undetermined (Co-sleeping) | 3 | A | G | Homozygous | *SCN10A* | 6514 | T3218C | V1073A | rs6795970 |
| 281 | 7 | Weeks | Undetermined (Co-sleeping) | 7 | T | G | Heterozygous | *KCNH2* | 172057 | A1670C | K557T | rs1805123 |
| 281 | 7 | Weeks | Undetermined (Co-sleeping) | 21 | T | C | Homozygous | *KCNE1* | 219 | A112G | S38G | rs1805127 |
| 282 | 5 | Months | Undetermined (Co-sleeping) | 1 | G | A |  | *RYR2* | 1035 | G5656A | G1886S | rs3766871 |
| 282 | 5 | Months | Undetermined (Co-sleeping) | 3 | T | C | Heterozygous | *SCN5A* | 198056 | A1673G | H558R | rs1805124 |
| 282 | 5 | Months | Undetermined (Co-sleeping) | 21 | T | C | Homozygous | *KCNE1* | 219 | A112G | S38G | rs1805127 |
| 282 | 5 | Months | Undetermined (Co-sleeping) | 3 | A | G | Heterozygous | *SCN10A* | 6514 | T3218C | V1073A | rs6795970 |
| 283 | 2 | Months | Undetermined (Co-sleeping) | 1 | G | A |  | *RYR2* | 1035 | G5656A | G1886S | rs3766871 |
| 283 | 2 | Months | Undetermined (Co-sleeping) | 10 | G | A | Heterozygous | *LDB3* | 1171611 | G349A | D117N | rs121908338 |
| 283 | 2 | Months | Undetermined (Co-sleeping) | 21 | T | C | Homozygous | *KCNE1* | 219 | A112G | S38G | rs1805127 |
| 283 | 2 | Months | Undetermined (Co-sleeping) | 4 | C | A | Heterozygous | *ANK2* | 1148 | C11218A | L3740I (L1622I) | rs35530544 |
| 283 | 2 | Months | Undetermined (Co-sleeping) | 3 | G | A | Heterozygous | *SCN5A* | 198056 | C3922T | L1308F | rs41313031 |
| 283 | 2 | Months | Undetermined (Co-sleeping) | 3 | A | G | Heterozygous | *SCN10A* | 6514 | T3218C | V1073A | rs6795970 |
| 284 | 3 | Months | Undetermined (Co-sleeping) | 1 | G | A |  | *RYR2* | 1035 | G5656A | G1886S | rs3766871 |
| 284 | 3 | Months | Undetermined (Co-sleeping) | 3 | T | C | Homozygous | *SCN5A* | 198056 | A1673G | H558R | rs1805124 |
| 284 | 3 | Months | Undetermined (Co-sleeping) | 21 | T | C | Heterozygous | *KCNE1* | 219 | A112G | S38G | rs1805127 |
| 284 | 3 | Months | Undetermined (Co-sleeping) | 4 | C | A | Heterozygous | *ANK2* | 1148 | C11218A | L3740I (L1622I) | rs35530544 |
| 284 | 3 | Months | Undetermined (Co-sleeping) | 3 | A | G | Homozygous | *SCN10A* | 6514 | T3218C | V1073A | rs6795970 |
| 285 | 16 | Days | Undetermined (Co-sleeping) | 21 | T | C | Heterozygous | *KCNE1* | 219 | A112G | S38G | rs1805127 |
| 285 | 16 | Days | Undetermined (Co-sleeping) | 3 | A | G | Homozygous | *SCN10A* | 6514 | T3218C | V1073A | rs6795970 |
| 285 | 16 | Days | Undetermined (Co-sleeping) | 3 | G | T | Heterozygous | *SCN5A* | 198056 | C3308A | S1103Y | rs7626962 |
| 286 | 3 | Months | Undetermined (Co-sleeping) | 7 | T | G | Heterozygous | *KCNH2* | 172057 | A1670C | K557T | rs1805123 |
| 286 | 3 | Months | Undetermined (Co-sleeping) | 21 | T | C | Homozygous | *KCNE1* | 219 | A112G | S38G | rs1805127 |
| 286 | 3 | Months | Undetermined (Co-sleeping) | 1 | G | A | Heterozygous | *RYR2* | 1035 | G5654A | G1885E | rs41315858 |
| 286 | 3 | Months | Undetermined (Co-sleeping) | 3 | A | G | Heterozygous | *SCN10A* | 6514 | T3218C | V1073A | rs6795970 |
| 287 | 3 | Months | Undetermined (Co-sleeping) | 1 | G | A |  | *RYR2* | 1035 | G5656A | G1886S | rs3766871 |
| 287 | 3 | Months | Undetermined (Co-sleeping) | 3 | T | C | Heterozygous | *SCN5A* | 198056 | A1673G | H558R | rs1805124 |
| 287 | 3 | Months | Undetermined (Co-sleeping) | 21 | A | G | Heterozygous | *KCNE2* | 172201 | A22G | T8A | rs2234916 |
| 287 | 3 | Months | Undetermined (Co-sleeping) | 17 | C | T | Heterozygous | *SCN4A* | 334 | G2341A | V781I | rs62070884 |
| 287 | 3 | Months | Undetermined (Co-sleeping) | 3 | A | G | Heterozygous | *SCN10A* | 6514 | T3218C | V1073A | rs6795970 |
| 289 | 1 | Months | Undetermined (Co-sleeping) | 7 | T | G | Heterozygous | *KCNH2* | 172057 | A1670C | K557T | rs1805123 |
| 289 | 1 | Months | Undetermined (Co-sleeping) | 21 | T | C | Homozygous | *KCNE1* | 219 | A112G | S38G | rs1805127 |
| 289 | 1 | Months | Undetermined (Co-sleeping) | 3 | A | G | Homozygous | *SCN10A* | 6514 | T3218C | V1073A | rs6795970 |
| 289 | 1 | Months | Undetermined (Co-sleeping) | 3 | G | T | Homozygous | *SCN5A* | 198056 | C3308A | S1103Y | rs7626962 |
| 290 | 4 | Months | Undetermined (Co-sleeping) | 21 | T | C | Homozygous | *KCNE1* | 219 | A112G | S38G | rs1805127 |
| 290 | 4 | Months | Undetermined (Co-sleeping) | 3 | A | G | Heterozygous | *SCN10A* | 6514 | T3218C | V1073A | rs6795970 |
| 291 | 5 | Months | SIDS | 3 | G | A | Heterozygous | *SCN10A* | 6514 | C5657T | A1886V | Rs142653846 |
| 291 | 5 | Months | SIDS | 3 | A | G | Homozygous | *SCN10A* | 6514 | T3218C | V1073A | rs6795970 |
| 293 | 6 | Days | Undetermined (Co-sleeping) | 21 | T | C | Homozygous | *KCNE1* | 219 | A112G | S38G | rs1805127 |
| 293 | 6 | Days | Undetermined (Co-sleeping) | 3 | G | A | Heterozygous | *SCN5A* | 1160161 | C1852T | L618F | rs45488304 |
| 293 | 6 | Days | Undetermined (Co-sleeping) | 3 | A | G | Homozygous | *SCN10A* | 6514 | T3218C | V1073A | rs6795970 |
| 294 | 3 | Months | SIDS | 21 | T | C | Homozygous | *KCNE1* | 219 | A112G | S38G | rs1805127 |
| 294 | 3 | Months | SIDS | 3 | A | G | Homozygous | *SCN10A* | 6514 | T3218C | V1073A | rs6795970 |
| 295 | 4 | Months | Undetermined (Co-sleeping) | 3 | T | C | Heterozygous | *SCN5A* | 1160161 | A1673G | H558R | rs1805124 |
| 295 | 4 | Months | Undetermined (Co-sleeping) | 3 | A | G | Homozygous | *SCN10A* | 6514 | T3218C | V1073A | rs6795970 |
| 296 | 2 | Months | SIDS | 3 | A | G | Heterozygous | *SCN10A* | 6514 | T3218C | V1073A | rs6795970 |
| 299 | 2 | Months | Undetermined | 3 | A | G | Heterozygous | *SCN10A* | 6514 | T3218C | V1073A | rs6795970 |
| 301 | 9 | Days | Undetermined | 10 | G | A | Heterozygous | *LDB3* | 1171611 | G349A | D117N | rs121908338 |
| 301 | 9 | Days | Undetermined | 21 | T | C | Homozygous | *KCNE1* | 219 | A112G | S38G | rs1805127 |
| 301 | 9 | Days | Undetermined | 11 | C | T | Heterozygous | *MYBPC3* | 256 | G646A | A216T | rs201098973 |
| 301 | 9 | Days | Undetermined | 3 | G | T | Heterozygous | *SCN5A* | 198056 | C1571A | S524Y | rs41313691 |
| 301 | 9 | Days | Undetermined | 3 | A | G | Homozygous | *SCN10A* | 6514 | T3218C | V1073A | rs6795970 |
| 303 | 4 | Months | SIDS | 3 | A | G | Homozygous | *SCN10A* | 6514 | T3218C | V1073A | rs6795970 |
| 304 | 30 | Days | Undetermined (Co-sleeping) | 21 | T | C | Homozygous | *KCNE1* | 219 | A112G | S38G | rs1805127 |
| 304 | 30 | Days | Undetermined (Co-sleeping) | 3 | A | G | Homozygous | *SCN10A* | 6514 | T3218C | V1073A | rs6795970 |
| 306 | 2 | Months | Undetermined (Co-sleeping) | 10 | G | A | Heterozygous | *LDB3* | 1080114 | G1130A | R377H | rs146265188 |
| 306 | 2 | Months | Undetermined (Co-sleeping) | 3 | A | G | Heterozygous | *SCN10A* | 6514 | T3218C | V1073A | rs6795970 |
| 307 | 3 | Months | Undetermined MCAD mutation A985G | 7 | T | G | Homozygous | *KCNH2* | 172057 | A1670C | K557T | rs1805123 |
| 307 | 3 | Months | Undetermined MCAD mutation A985G | 3 | T | C | Heterozygous | *SCN5A* | 1160160 | A1673G | H558R | rs1805124 |
| 307 | 3 | Months | Undetermined MCAD mutation A985G | 3 | A | G | Heterozygous | *SCN10A* | 6514 | T3218C | V1073A | rs6795970 |
| 307 | 3 | Months | Undetermined MCAD mutation A985G | 1 | A | G | Heterozygous | *ACADM* | 16 | A985G | K329E | rs77931234 |
| 308 | 3 | Months | Undetermined (Co-sleeping) | 3 | A | G | Homozygous | *SCN10A* | 6514 | T3218C | V1073A | rs6795970 |
| 309 | 3 | Months | Undetermined (Co-sleeping) | 21 | A | G | Heterozygous | *KCNE2* | 172201 | A22G | T8A | rs2234916 |
| 309 | 3 | Months | Undetermined (Co-sleeping) | 3 | C | A | Heterozygous | *SCN5A* | 1160161 | G5851T | V1951L | rs41315493 |
| 309 | 3 | Months | Undetermined (Co-sleeping) | 3 | A | G | Homozygous | *SCN10A* | 6514 | T3218C | V1073A | rs6795970 |
| 310 | 2 | Months | SIDS | 10 | A | G | Heterozygous | *LDB3* | 7078 | A752G | K251R | rs34423165 |
| 310 | 2 | Months | SIDS | 11 | G | A | Heterozygous | *MYBPC3* | 256 | C2499T | A833V | RS3729952 |
| 310 | 2 | Months | SIDS | 3 | A | G | Homozygous | *SCN10A* | 6514 | T3218C | V1073A | rs6795970 |
| 311 | 8 | Months | Undetermined | 21 | T | C | Heterozygous | *KCNE1* | 219 | A112G | S38G | rs1805127 |
| 313 | 1 | Months | Undetermined | 3 | T | C | Heterozygous | *SCN5A* | 1160161 | A1673G | H558R | rs1805124 |
| 313 | 1 | Months | Undetermined | 3 | A | G | Homozygous | *SCN10A* | 6514 | T3218C | V1073A | rs6795970 |
| 314 | 5 | Months | SIDS | 21 | T | C | Homozygous | *KCNE1* | 219 | A112G | S38G | rs1805127 |
| 314 | 5 | Months | SIDS | 3 | A | G | Homozygous | *SCN10A* | 6514 | T3218C | V1073A | rs6795970 |
| 315 | 3 | Months | SIDS | 7 | T | G | Heterozygous | *KCNH2* | 172057 | A1670C | K557T | rs1805123 |
| 315 | 3 | Months | SIDS | 21 | T | C | Heterozygous | *KCNE1* | 219 | A112G | S38G | rs1805127 |
| 315 | 3 | Months | SIDS | 3 | A | G | Homozygous | *SCN10A* | 6514 | T3218C | V1073A | rs6795970 |
| 316 | 11 | Days | Undetermined (Co-sleeping) | 1 | G | A |  | *RYR2* | 1035 | G5656A | G1886S | rs3766871 |
| 316 | 11 | Days | Undetermined (Co-sleeping) | 3 | A | G | Homozygous | *SCN10A* | 6514 | T3218C | V1073A | rs6795970 |
| 317 | 3 | Months | SIDS | 3 | A | G | Heterozygous | *SCN10A* | 6514 | T3218C | V1073A | rs6795970 |
| 320 | 2 | Months | Undetermined | 1 | G | A |  | *RYR2* | 1035 | G5656A | G1886S | rs3766871 |
| 320 | 2 | Months | Undetermined | 21 | T | C | Homozygous | *KCNE1* | 219 | A112G | S38G | rs1805127 |
| 320 | 2 | Months | Undetermined | 3 | T | C | Heterozygous | *SCN5A* | 198056 | A1673G | H558R | rs1850124 |
| 320 | 2 | Months | Undetermined | 3 | A | G | Heterozygous | *SCN10A* | 6514 | T3218C | V1073A | rs6795970 |
| 323 | 2 | Months | Undetermined (Co-sleeping) | 21 | T | C | Homozygous | *KCNE1* | 219 | A112G | S38G | rs1805127 |
| 323 | 2 | Months | Undetermined (Co-sleeping) | 3 | A | G | Homozygous | *SCN10A* | 6514 | T3218C | V1073A | rs6795970 |
| 325 | 3 | Months | Undetermined (Co-sleeping) | 21 | T | C | Heterozygous | *KCNE1* | 219 | A112G | S38G | rs1805127 |
| 325 | 3 | Months | Undetermined (Co-sleeping) | 21 | A | G | Heterozygous | *KCNE2* | 172201 | A22G | T8A | rs2234916 |
| 325 | 3 | Months | Undetermined (Co-sleeping) | 3 | A | G | Heterozygous | *SCN10A* | 6514 | T3218C | V1073A | rs6795970 |
| 326 | 2 | Months | Undetermined | 1 | G | A |  | *RYR2* | 1035 | G5656A | G1886S | rs3766871 |
| 326 | 2 | Months | Undetermined | 3 | T | C | Heterozygous | *SCN5A* | 198056 | A1673G | H558R | rs1805124 |
| 326 | 2 | Months | Undetermined | 21 | T | C | Heterozygous | *KCNE1* | 219 | A112G | S38G | rs1805127 |
| 326 | 2 | Months | Undetermined | 3 | A | G | Heterozygous | *SCN10A* | 6514 | T3218C | V1073A | rs6795970 |
| 328 | 2 | Months | Undetermined (Co-sleeping) | 3 | T | C | Heterozygous | *SCN5A* | 198056 | A1673G | H558R | rs1805124 |
| 328 | 2 | Months | Undetermined (Co-sleeping) | 21 | T | C | Homozygous | *KCNE1* | 219 | A112G | S38G | rs1805127 |
| 329 | 30 | Days | Undetermined (Co-sleeping) | 3 | T | C | Heterozygous | *SCN5A* | 198056 | A1673G | H558R | rs1805124 |
| 329 | 30 | Days | Undetermined (Co-sleeping) | 21 | T | C | Heterozygous | *KCNE1* | 219 | A112G | S38G | rs1805127 |
| 329 | 30 | Days | Undetermined (Co-sleeping) | 3 | A | G | Homozygous | *SCN10A* | 6514 | T3218C | V1073A | rs6795970 |
| 330 | 1 | Months | Undetermined | 3 | T | C | Heterozygous | *SCN5A* | 198056 | A1673G | H558R | rs1805124 |
| 330 | 1 | Months | Undetermined | 3 | A | G | Homozygous | *SCN10A* | 6514 | T3218C | V1073A | rs6795970 |
| 331 | 9 | Days | Undetermined (Co-sleeping) | 21 | T | C | Homozygous | *KCNE1* | 219 | A112G | S38G | rs1805127 |
| 331 | 9 | Days | Undetermined (Co-sleeping) | 3 | C | A | Heterozygous | *SCN5A* | 1160161 | G5851T | V1951L | rs41315493 |
| 331 | 9 | Days | Undetermined (Co-sleeping) | 3 | A | G | Heterozygous | *SCN10A* | 6514 | T3218C | V1073A | rs6795970 |
| 333 | 2 | Months | Undetermined (Co-sleeping) | 3 | A | G | Homozygous | *SCN10A* | 6514 | T3218C | V1073A | rs6795970 |
| 334 | 23 | Days | Undetermined (Co-sleeping) | 21 | T | C | Heterozygous | *KCNE1* | 219 | A112G | S38G | rs1805127 |
| 334 | 23 | Days | Undetermined (Co-sleeping) | 3 | A | G | Homozygous | *SCN10A* | 6514 | T3218C | V1073A | rs6795970 |
| 334 | 23 | Days | Undetermined (Co-sleeping) | 3 | G | T | Heterozygous | *SCN5A* | 198056 | C3308A | S1103Y | rs7626962 |
| 337 | 2 | Months | Undetermined | 12 | C | T | Heterozygous | *PKP2* | 1005242 | G1627A | V543I (V587I) | rs146102241 |
| 337 | 2 | Months | Undetermined | 3 | T | C | Heterozygous | *SCN5A* | 198056 | A1673G | H558R | rs1805124 |
| 337 | 2 | Months | Undetermined | 21 | T | C | Homozygous | *KCNE1* | 219 | A112G | S38G | rs1805127 |
| 337 | 2 | Months | Undetermined | 3 | A | G | Heterozygous | *SCN10A* | 6514 | T3218C | V1073A | rs6795970 |
| 338 | 2 | Months | Undetermined (Co-sleeping) | 7 | T | G | Homozygous | *KCNH2* | 172057 | A1670C | K557T | rs1805123 |
| 338 | 2 | Months | Undetermined (Co-sleeping) | 21 | T | C | Homozygous | *KCNE1* | 219 | A112G | S38G | rs1805127 |
| 338 | 2 | Months | Undetermined (Co-sleeping) | 17 | C | T | Heterozygous | *SCN4A* | 334 | G2341A | V781I | rs62070884 |
| 339 | 1 | Months | Undetermined | 3 | A | G | Heterozygous | *SCN10A* | 6514 | T3218C | V1073A | rs6795970 |
| 340 | 26 | Days | Undetermined (Co-sleeping) | 10 | C | T | Heterozygous | *VCL* | 14000 | C2801T | A934V | rs16931179 |
| 340 | 26 | Days | Undetermined (Co-sleeping) | 7 | T | G | Heterozygous | *KCNH2* | 172057 | A1670C | K557T | rs1805123 |
| 340 | 26 | Days | Undetermined (Co-sleeping) | 21 | T | C | Heterozygous | *KCNE1* | 219 | A112G | S38G | rs1805127 |
| 340 | 26 | Days | Undetermined (Co-sleeping) | 3 | A | G | Heterozygous | *SCN10A* | 6514 | T3218C | V1073A | rs6795970 |
| 341 | 6 | Months | Undetermined (Co-sleeping) | 21 | T | C | Homozygous | *KCNE1* | 219 | A112G | S38G | rs1805127 |
| 341 | 6 | Months | Undetermined (Co-sleeping) | 3 | A | G | Homozygous | *SCN10A* | 6514 | T3218C | V1073A | rs6795970 |
| 342 | 6 | Days | Undetermined | 21 | T | C | Heterozygous | *KCNE1* | 219 | A112G | S38G | rs1805127 |
| 343 | 30 | Days | Undetermined (Co-sleeping) | 7 | T | G | Heterozygous | *KCNH2* | 172057 | A1670C | K557T | rs1805123 |
| 343 | 30 | Days | Undetermined (Co-sleeping) | 3 | T | C | Heterozygous | *SCN5A* | 198056 | A1673G | H558R | rs1805124 |
| 343 | 30 | Days | Undetermined (Co-sleeping) | 21 | T | C | Homozygous | *KCNE1* | 219 | A112G | S38G | rs1805127 |
| 343 | 30 | Days | Undetermined (Co-sleeping) | 21 | C | T | Heterozygous | *KCNE1* | 219 | G253A | D85N | rs1805128 |
| 343 | 30 | Days | Undetermined (Co-sleeping) | 3 | A | G | Homozygous | *SCN10A* | 6514 | T3218C | V1073A | rs6795970 |
| 343 | 30 | Days | Undetermined (Co-sleeping) | 8 | G | A | Heterozygous | *KCNQ3* | 4519 | C1720T | P574S | rs74582884 |
| 344 | 4 | Months | Undetermined (Co-sleeping) | 3 | T | C | Heterozygous | *SCN5A* | 198056 | A1673G | H558R | rs1805124 |
| 344 | 4 | Months | Undetermined (Co-sleeping) | 21 | T | C | Homozygous | *KCNE1* | 219 | A112G | S38G | rs1805127 |
| 344 | 4 | Months | Undetermined (Co-sleeping) | 3 | A | G | Heterozygous | *SCN10A* | 6514 | T3218C | V1073A | rs6795970 |
| 345 | 4 | Months | Undetermined (Co-sleeping) | 1 | G | A |  | *RYR2* | 1035 | G5656A | G1886S | rs3766871 |
| 345 | 4 | Months | Undetermined (Co-sleeping) | 21 | T | C | Homozygous | *KCNE1* | 219 | A112G | S38G | rs1805127 |
| 345 | 4 | Months | Undetermined (Co-sleeping) | 3 | A | G | Homozygous | *SCN10A* | 6514 | T3218C | V1073A | rs6795970 |
| 346 | 1 | Months | Undetermined (Co-sleeping) | 1 | G | A |  | *RYR2* | 1035 | G5656A | G1886S | rs3766871 |
| 346 | 1 | Months | Undetermined (Co-sleeping) | 3 | T | C | Heterozygous | *SCN5A* | 198056 | A1673G | H558R | rs1805124 |
| 346 | 1 | Months | Undetermined (Co-sleeping) | 21 | T | C | Heterozygous | *KCNE1* | 219 | A112G | S38G | rs1805127 |
| 346 | 1 | Months | Undetermined (Co-sleeping) | 3 | A | G | Homozygous | *SCN10A* | 6514 | T3218C | V1073A | rs6795970 |
| 346 | 1 | Months | Undetermined (Co-sleeping) | 3 | G | A | Heterozygous | *SCN5A* | 198056 | C86T | A29V |  |
| 347 | 4 | Months | Undetermined (Co-sleeping) | 3 | T | C | Heterozygous | *SCN5A* | 198056 | A1673G | H558R | rs1805124 |
| 347 | 4 | Months | Undetermined (Co-sleeping) | 3 | A | G | Heterozygous | *SCN10A* | 6514 | T3218C | V1073A | rs6795970 |

**Supplemental Table 2. B**. Children / young adult (1-40 years)

| **Case** | **Age** | | **Cause** | **CHR** | **REF** | **ALT** | **Genotype** | **Gene** | **NM** | **Base Sub.** | **AA sub.** | **RS#** |
| --- | --- | --- | --- | --- | --- | --- | --- | --- | --- | --- | --- | --- |
| 9 | 15 | Years | Cardio-  myopathy | 6 | G | A | Heterozygous | *DSP* | 4415 | G88A | V30M | rs121912998 |
| 9 | 15 | Years | Cardio-myopathy | 3 | T | C | Heterozygous | *SCN5A* | 198056 | A1673G | H558R | rs1805124 |
| 9 | 15 | Years | Cardio-myopathy | 21 | T | C | Homozygous | *KCNE1* | 219 | A112G | S38G | rs1805127 |
| 9 | 15 | Years | Cardio-myopathy | 21 | C | T | Heterozygous | *KCNE1* | 219 | G253A | D85N | rs1805128 |
| 9 | 15 | Years | Cardio-myopathy | 3 | A | G | Homozygous | *SCN10A* | 6514 | T3218C | V1073A | rs6795970 |
| 10 | 24 | Years | Long QT syndrome | 7 | T | G | Homozygous | *KCNH2* | 172057 | A1670C | K557T | rs1805123 |
| 10 | 24 | Years | Long QT syndrome | 21 | T | C | Homozygous | *KCNE1* | 219 | A112G | S38G | rs1805127 |
| 10 | 24 | Years | Long QT syndrome | 21 | C | T | Heterozygous | *KCNE1* | 219 | G253A | D85N | rs1805128 |
| 10 | 24 | Years | Long QT syndrome | 11 | G | C | Heterozygous | *SCN3B* | 18400 | C423G | I141M |  |
| 11 | 27 | Years | Undetermined | 12 | C | T | Heterozygous | *MYL2* | 432 | G64A | E22K | rs104894368 |
| 11 | 27 | Years | Undetermined | 21 | T | C | Heterozygous | *KCNE1* | 219 | A112G | S38G | rs1805127 |
| 11 | 27 | Years | Undetermined | 3 | A | G | Heterozygous | *SCN10A* | 6514 | T3218C | V1073A | rs6795970 |
| 12 | 32 | Years | Undetermined | 3 | C | T | Heterozygous | *SCN5A* | 1160161 | G1844A | G615E | rs12720452 |
| 12 | 32 | Years | Undetermined | 7 | T | G | Homozygous | *KCNH2* | 172057 | A1670C | K557T | rs1805123 |
| 12 | 32 | Years | Undetermined | 3 | T | C | Heterozygous | *SCN5A* | 1160161 | A1673G | H558R | rs1805124 |
| 12 | 32 | Years | Undetermined | 3 | A | G | Heterozygous | *SCN10A* | 6514 | T3218C | V1073A | rs6795970 |
| 12 | 32 | Years | Undetermined | 19 | G | A | Heterozygous | *SCN1B* | 199037 | G457A | D153N | rs72550247 |
| 12 | 32 | Years | Undetermined | 1 | A | G | Heterozygous | *ACADM* | 16 | A985G | K329E | rs77931234 |
| 13 | 37 | Years | Cardiomyopathy | 3 | T | C | Heterozygous | *SCN5A* | 1160160 | A1673G | H558R | rs1805124 |
| 13 | 37 | Years | Cardiomyopathy | 21 | T | C | Homozygous | *KCNE1* | 219 | A112G | S38G | rs1805127 |
| 13 | 37 | Years | Cardiomyopathy | 3 | A | G | Homozygous | *SCN10A* | 6514 | T3218C | V1073A | rs6795970 |
| 13 | 37 | Years | Cardiomyopathy | 11 | C | G | Heterozygous | *MYBPC3* | 256 | G13C | G5R | rs201278114 |
| 15 | 9 | Years | Undetermined | 3 | C | T | Heterozygous | *SCN10A* | 6514 | G3803A | R1268Q | rs138832868 |
| 15 | 9 | Years | Undetermined | 21 | T | C | Homozygous | *KCNE1* | 219 | A112G | S38G | rs1805127 |
| 15 | 9 | Years | Undetermined | 3 | A | G | Homozygous | *SCN10A* | 6514 | T3218C | V1073A | rs6795970 |
| 16 | 24 | Years | Undetermined | 21 | T | C | Heterozygous | *KCNE1* | 219 | A112G | S38G | rs1805127 |
| 16 | 24 | Years | Undetermined | 3 | C | A | Heterozygous | *SCN5A* | 198056 | G5851T | V1951L | rs41315493 |
| 16 | 24 | Years | Undetermined | 3 | A | G | Homozygous | *SCN10A* | 6514 | T3218C | V1073A | rs6795970 |
| 18 | 25 | Years | Undetermined | 1 | G | A |  | *RYR2* | 1035 | G5656A | G1886S | rs3766871 |
| 18 | 25 | Years | Undetermined | 3 | T | C | Heterozygous | *SCN5A* | 1160160 | A1673G | H558R | rs1805124 |
| 18 | 25 | Years | Undetermined | 21 | T | C | Homozygous | *KCNE1* | 219 | A112G | S38G | rs1805127 |
| 18 | 25 | Years | Undetermined | 11 | G | A | Heterozygous | *MYBPC3* | 256 | C2499T | A833V | RS3729952 |
| 18 | 25 | Years | Undetermined | 3 | A | G | Homozygous | *SCN10A* | 6514 | T3218C | V1073A | rs6795970 |
| 21 | 29 | Years | Undetermined | 11 | G | C | Heterozygous | *MYBPC3* | 256 | C2993G | Q998E | rs11570112 |
| 21 | 29 | Years | Undetermined | 21 | T | C | Heterozygous | *KCNE1* | 219 | A112G | S38G | rs1805127 |
| 21 | 29 | Years | Undetermined | 3 | A | G | Heterozygous | *SCN10A* | 6514 | T3218C | V1073A | rs6795970 |
| 23 | 22 | Years | Cardiomyopathy | 7 | T | G | Heterozygous | *KCNH2* | 172057 | A1670C | K557T | rs1805123 |
| 23 | 22 | Years | Cardiomyopathy | 21 | T | C | Heterozygous | *KCNE1* | 219 | A112G | S38G | rs1805127 |
| 23 | 22 | Years | Cardiomyopathy | 3 | A | G | Heterozygous | *SCN10A* | 6514 | T3218C | V1073A | rs6795970 |
| 25 | 16 | Years | Undetermined | 3 | T | C | Heterozygous | *SCN5A* | 1160160 | A1673G | H558R | rs1805124 |
| 25 | 16 | Years | Undetermined | 21 | T | C | Homozygous | *KCNE1* | 219 | A112G | S38G | rs1805127 |
| 25 | 16 | Years | Undetermined | 3 | A | G | Homozygous | *SCN10A* | 6514 | T3218C | V1073A | rs6795970 |
| 26 | 23 | Years | Cardiomyopathy | 3 | T | C | Heterozygous | *SCN5A* | 198056 | A1673G | H558R | rs1805124 |
| 26 | 23 | Years | Cardiomyopathy | 21 | T | C | Homozygous | *KCNE1* | 219 | A112G | S38G | rs1805127 |
| 26 | 23 | Years | Cardiomyopathy | 3 | A | G | Heterozygous | *SCN10A* | 6514 | T3218C | V1073A | rs6795970 |
| 33 | 26 | Years | Undetermined | 21 | T | C | Homozygous | *KCNE1* | 219 | A112G | S38G | rs1805127 |
| 33 | 26 | Years | Undetermined | 3 | A | G | Heterozygous | *SCN10A* | 6514 | T3218C | V1073A | rs6795970 |
| 35 | 19 | Years | Undetermined | 3 | T | C | Heterozygous | *SCN5A* | 1160160 | A1673G | H558R | rs1805124 |
| 35 | 19 | Years | Undetermined | 21 | T | C | Heterozygous | *KCNE1* | 219 | A112G | S38G | rs1805127 |
| 35 | 19 | Years | Undetermined | 3 | A | G | Homozygous | *SCN10A* | 6514 | T3218C | V1073A | rs6795970 |
| 38 | 18 | Years | Undetermined | 10 | G | A | Heterozygous | *LDB3* | 1080114 | G349A | D117N | rs121908338 |
| 38 | 18 | Years | Undetermined | 7 | T | G | Heterozygous | *KCNH2* | 172057 | A1670C | K557T | rs1805123 |
| 38 | 18 | Years | Undetermined | 21 | T | C | Homozygous | *KCNE1* | 219 | A112G | S38G | rs1805127 |
| 38 | 18 | Years | Undetermined | 3 | A | G | Heterozygous | *SCN10A* | 6514 | T3218C | V1073A | rs6795970 |
| 39 | 19 | Years | Sudden cardiac death with biventricular dilatation | 21 | C | T | Homozygous | *KCNE1* | 219 | A112G | S38G | rs1805127 |
| 39 | 19 | Years | Sudden cardiac death with biventricular dilatation | 3 | C | T | Heterozygous | *SCN10A* | 6514 | T3218C | V1073A | rs6795970 |
| 40 | 19 | Years | Undetermined | 3 | G | A | Heterozygous | *SCN5A* | 198056 | C1441T | R481W | rs144511230 |
| 40 | 19 | Years | Undetermined | 3 | T | C | Heterozygous | *SCN5A* | 1160160 | A1673G | H558R | rs1805124 |
| 40 | 19 | Years | Undetermined | X | C | A | Homozygous | *GLA* | 169 | G937T | D313Y | rs28935490 |
| 40 | 19 | Years | Undetermined | 3 | A | G | Heterozygous | *SCN10A* | 6514 | T3218C | V1073A | rs6795970 |
| 41 | 2 | Years | Undetermined | 7 | T | G | Heterozygous | *KCNH2* | 172057 | A1670C | K557T | rs1805123 |
| 41 | 2 | Years | Undetermined | 3 | T | C | Heterozygous | *SCN5A* | 198056 | A1673G | H558R | rs1805124 |
| 41 | 2 | Years | Undetermined | 21 | T | C | Heterozygous | *KCNE1* | 219 | A112G | S38G | rs1805127 |
| 41 | 2 | Years | Undetermined | 1 | G | A | Heterozygous | *RYR2* | 1035 | G5654A | G1885E | rs41315858 |
| 41 | 2 | Years | Undetermined | 3 | A | G | Heterozygous | *SCN10A* | 6514 | T3218C | V1073A | rs6795970 |
| 42 | 11 | Years | Sudden cardiac death associated with coronary artery anomaly | 3 | A | G | Heterozygous | *SCN10A* | 6514 | T3218C | V1073A | rs6795970 |
| 61 | 18 | Years | Undetermined | 11 | G | C | Heterozygous | *MYBPC3* | 256 | C2993G | Q998E | rs11570112 |
| 61 | 18 | Years | Undetermined | 3 | T | C | Heterozygous | *SCN5A* | 1160160 | A1673G | H558R | rs1805124 |
| 61 | 18 | Years | Undetermined | 21 | T | C | Homozygous | *KCNE1* | 219 | A112G | S38G | rs1805127 |
| 61 | 18 | Years | Undetermined | 3 | A | G | Heterozygous | *SCN10A* | 6514 | T3218C | V1073A | rs6795970 |
| 92 | 2 | Years | Undetermined | 3 | T | C | Heterozygous | *SCN5A* | 1160160 | A1673G | H558R | rs1805124 |
| 92 | 2 | Years | Undetermined | 21 | T | C | Heterozygous | *KCNE1* | 219 | A112G | S38G | rs1805127 |
| 92 | 2 | Years | Undetermined | 11 | C | T | Heterozygous | *MYBPC3* | 256 | G2309A | D770N | rs36211723 |
| 92 | 2 | Years | Undetermined | 3 | A | G | Heterozygous | *SCN10A* | 6514 | T3218C | V1073A | rs6795970 |
| 105 | 22 | Years | Undetermined | 21 | T | C | Heterozygous | *KCNE1* | 219 | A112G | S38G | rs1805127 |
| 105 | 22 | Years | Undetermined | 3 | A | G | Heterozygous | *SCN10A* | 6514 | T3218C | V1073A | rs6795970 |
| 115 | 14 | Years | Undetermined | 21 | T | C | Homozygous | *KCNE1* | 219 | A112G | S38G | rs1805127 |
| 115 | 14 | Years | Undetermined | 3 | A | G | Homozygous | *SCN10A* | 6514 | T3218C | V1073A | rs6795970 |
| 138 | 33 | Years | Undetermined | 3 | T | C | Heterozygous | *SCN5A* | 1160160 | A1673G | H558R | rs1805124 |
| 138 | 33 | Years | Undetermined | 21 | T | C | Heterozygous | *KCNE1* | 219 | A112G | S38G | rs1805127 |
| 138 | 33 | Years | Undetermined | 6 | A | T | Heterozygous | *DSP* | 4415 | A1481T | Y494F | rs28763961 |
| 138 | 33 | Years | Undetermined | 3 | A | G | Homozygous | *SCN10A* | 6514 | T3218C | V1073A | rs6795970 |
| 161 | 3 | Years | Undetermined | 21 | T | C | Heterozygous | *KCNE1* | 219 | A112G | S38G | rs1805127 |
| 161 | 3 | Years | Undetermined | 3 | A | G | Homozygous | *SCN10A* | 6514 | T3218C | V1073A | rs6795970 |
| 176 | 22 | Years | Undetermined | 7 | T | G | Heterozygous | *KCNH2* | 172057 | A1670C | K557T | rs1805123 |
| 176 | 22 | Years | Undetermined | 21 | T | C | Heterozygous | *KCNE1* | 219 | A112G | S38G | rs1805127 |
| 202 | 23 | Years | Undetermined | 21 | T | C | Heterozygous | *KCNE1* | 219 | A112G | S38G | rs1805127 |
| 202 | 23 | Years | Undetermined | 3 | A | G | Homozygous | *SCN10A* | 6514 | T3218C | V1073A | rs6795970 |
| 203 | 2 | Years | Undetermined | 21 | C | T | Heterozygous | *KCNE2* | 172201 | C229T | R77W | rs141423405 |
| 203 | 2 | Years | Undetermined | 21 | T | C | Heterozygous | *KCNE1* | 219 | A112G | S38G | rs1805127 |
| 203 | 2 | Years | Undetermined | 3 | A | G | Heterozygous | *SCN10A* | 6514 | T3218C | V1073A | rs6795970 |
| 207 | 3 | Years | Undetermined (co-sleeping) | 1 | G | A |  | *RYR2* | 1035 | G5656A | G1886S | rs3766871 |
| 207 | 3 | Years | Undetermined (co-sleeping) | 3 | T | C | Heterozygous | *SCN5A* | 1160161 | A1673G | H558R | rs1805124 |
| 207 | 3 | Years | Undetermined (co-sleeping) | 21 | T | C | Homozygous | *KCNE1* | 219 | A112G | S38G | rs1805127 |
| 207 | 3 | Years | Undetermined (co-sleeping) | 3 | A | G | Homozygous | *SCN10A* | 6514 | T3218C | V1073A | rs6795970 |
| 215 | 26 | Years | Not listed | 21 | T | C | Homozygous | *KCNE1* | 219 | A112G | S38G | rs1805127 |
| 215 | 26 | Years | Not listed | 1 | A | G | Heterozygous | *RYR2* | 1035 | A4652G | N1551S | rs185237690 |
| 215 | 26 | Years | Not listed | 1 | G | A | Heterozygous | *RYR2* | 1035 | G5654A | G1885E | rs41315858 |
| 215 | 26 | Years | Not listed | 3 | A | G | Homozygous | *SCN10A* | 6514 | T3218C | V1073A | rs6795970 |
| 216 | 19 | Years | Not listed | 21 | T | C | Heterozygous | *KCNE1* | 219 | A112G | S38G | rs1805127 |
| 217 | 19 | Years | Not listed | 1 | G | A |  | *RYR2* | 1035 | G5656A | G1886S | rs3766871 |
| 217 | 19 | Years | Not listed | 21 | T | C | Homozygous | *KCNE1* | 219 | A112G | S38G | rs1805127 |
| 217 | 19 | Years | Not listed | 3 | A | G | Homozygous | *SCN10A* | 6514 | T3218C | V1073A | rs6795970 |
| 217 | 19 | Years | Not listed | 3 | G | T | Heterozygous | *SCN5A* | 198056 | C3308A | S1103Y | rs7626962 |
| 218 | 32 | Years | Not listed | 21 | T | C | Homozygous | *KCNE1* | 219 | A112G | S38G | rs1805127 |
| 218 | 32 | Years | Not listed | 3 | A | G | Heterozygous | *SCN10A* | 6514 | T3218C | V1073A | rs6795970 |
| 219 | 25 | Years | Not listed | 11 | G | C | Heterozygous | *MYBPC3* | 256 | C2993G | Q998E | rs11570112 |
| 219 | 25 | Years | Not listed | 21 | T | C | Heterozygous | *KCNE1* | 219 | A112G | S38G | rs1805127 |
| 219 | 25 | Years | Not listed | 3 | A | G | Homozygous | *SCN10A* | 6514 | T3218C | V1073A | rs6795970 |
| 219 | 25 | Years | Not listed | 1 | C | T | Heterozygous | *ACADM* | 16 | C250T | L84F |  |
| 229 | 3 | Years | Undetermined | 3 | T | C | Homozygous | *SCN5A* | 1160161 | A1673G | H558R | rs1805124 |
| 229 | 3 | Years | Undetermined | 21 | T | C | Homozygous | *KCNE1* | 219 | A112G | S38G | rs1805127 |
| 229 | 3 | Years | Undetermined | 3 | A | G | Homozygous | *SCN10A* | 6514 | T3218C | V1073A | rs6795970 |
| 260 | 12 | Years | Undetermined | 1 | G | A |  | *RYR2* | 1035 | G5656A | G1886S | rs3766871 |
| 260 | 12 | Years | Undetermined | 3 | A | G | Homozygous | *SCN10A* | 6514 | T3218C | V1073A | rs6795970 |
| 279 | 3 | Years | Undetermined | 7 | T | G | Heterozygous | *KCNH2* | 172057 | A1670C | K557T | rs1805123 |
| 279 | 3 | Years | Undetermined | 21 | T | C | Heterozygous | *KCNE1* | 219 | A112G | S38G | rs1805127 |
| 279 | 3 | Years | Undetermined | 3 | A | G | Heterozygous | *SCN10A* | 6514 | T3218C | V1073A | rs6795970 |
| 292 | 28 | Years | Undetermined | 3 | A | G | Homozygous | *SCN10A* | 6514 | T3218C | V1073A | rs6795970 |
| 298 | 3 | Years | Undetermined | 1 | G | A |  | *RYR2* | 1035 | G5656A | G1886S | rs3766871 |
| 298 | 3 | Years | Undetermined | 3 | T | C | Heterozygous | *SCN5A* | 1160161 | A1673G | H558R | rs1805124 |
| 298 | 3 | Years | Undetermined | 3 | A | G | Homozygous | *SCN10A* | 6514 | T3218C | V1073A | rs6795970 |
| 300 | 20 | Years | Undetermined | 1 | G | A |  | *RYR2* | 1035 | G5656A | G1886S | rs3766871 |
| 300 | 20 | Years | Undetermined | 3 | T | C | Heterozygous | *SCN5A* | 1160161 | A1673G | H558R | rs1805124 |
| 300 | 20 | Years | Undetermined | 3 | A | G | Homozygous | *SCN10A* | 6514 | T3218C | V1073A | rs6795970 |
| 302 | 31 | Years | Sudden cardiac death complicating congenital heart disease | 21 | T | C | Heterozygous | *KCNE1* | 219 | A112G | S38G | rs1805127 |
| 302 | 31 | Years | Sudden cardiac death complicating congenital heart disease | 3 | A | G | Homozygous | *SCN10A* | 6514 | T3218C | V1073A | rs6795970 |
| 302 | 31 | Years | Sudden cardiac death complicating congenital heart disease | 3 | G | T | Heterozygous | *SCN5A* | 198056 | C3308A | S1103Y | rs7626962 |
| 312 | 4 | Years | Hypertrophic cardiomyopathy | 3 | T | C | Heterozygous | *SCN5A* | 198056 | A1673G | H558R | rs1805124 |
| 312 | 4 | Years | Hypertrophic cardiomyopathy | 21 | T | C | Heterozygous | *KCNE1* | 219 | A112G | S38G | rs1805127 |
| 312 | 4 | Years | Hypertrophic cardiomyopathy | 3 | A | G | Homozygous | *SCN10A* | 6514 | T3218C | V1073A | rs6795970 |
| 319 | 33 | Years | Undetermined | 7 | T | G | Heterozygous | *KCNH2* | 172057 | A1670C | K557T | rs1805123 |
| 319 | 33 | Years | Undetermined | 21 | T | C | Heterozygous | *KCNE1* | 219 | A112G | S38G | rs1805127 |
| 319 | 33 | Years | Undetermined | 3 | A | G | Homozygous | *SCN10A* | 6514 | T3218C | V1073A | rs6795970 |
| 321 | 29 | Years | Undetermined | 3 | T | C | Heterozygous | *SCN5A* | 198056 | A1673G | H558R | rs1805124 |
| 321 | 29 | Years | Undetermined | 3 | A | G | Homozygous | *SCN10A* | 6514 | T3218C | V1073A | rs6795970 |
| 322 | 25 | Years | Undetermined | 21 | T | C | Heterozygous | *KCNE1* | 219 | A112G | S38G | rs1805127 |
| 322 | 25 | Years | Undetermined | 3 | A | G | Homozygous | *SCN10A* | 6514 | T3218C | V1073A | rs6795970 |
| 327 | 3 | Years | Undetermined | 3 | G | A | Heterozygous | *SCN10A* | 6514 | C5657T | A1886V | Rs142653846 |
| 327 | 3 | Years | Undetermined | 3 | A | G | Homozygous | *SCN10A* | 6514 | T3218C | V1073A | rs6795970 |
| 332 | 34 | Years | Undetermined | 3 | A | G | Homozygous | *SCN10A* | 6514 | T3218C | V1073A | rs6795970 |
| 335 | 33 | Years | Undetermined | 3 | T | C | Heterozygous | *SCN5A* | 198056 | A1673G | H558R | rs1805124 |
| 335 | 33 | Years | Undetermined | 21 | T | C | Homozygous | *KCNE1* | 219 | A112G | S38G | rs1805127 |
| 335 | 33 | Years | Undetermined | 3 | A | G | Heterozygous | *SCN10A* | 6514 | T3218C | V1073A | rs6795970 |
| 336 | 21 | Years | Undetermined | 1 | G | A |  | *RYR2* | 1035 | G5656A | G1886S | rs3766871 |
| 336 | 21 | Years | Undetermined | 21 | T | C | Heterozygous | *KCNE1* | 219 | A112G | S38G | rs1805127 |
| 336 | 21 | Years | Undetermined | 3 | A | G | Homozygous | *SCN10A* | 6514 | T3218C | V1073A | rs6795970 |
| 336 | 21 | Years | Undetermined | 3 | G | T | Heterozygous | *SCN5A* | 198056 | C3308A | S1103Y | rs7626962 |
| 28 | 17 | Months | Undetermined | 1 | G | A |  | *RYR2* | 1035 | G5656A | G1886S | rs3766871 |
| 28 | 17 | Months | Undetermined | 7 | T | G | Heterozygous | *KCNH2* | 172057 | A1670C | K557T | rs1805123 |
| 28 | 17 | Months | Undetermined | 3 | A | G | Homozygous | *SCN10A* | 6514 | T3218C | V1073A | rs6795970 |
| 94 | 17 | Months | Undetermined | 7 | T | G | Heterozygous | *KCNH2* | 172057 | A1670C | K557T | rs1805123 |
| 94 | 17 | Months | Undetermined | 3 | T | C | Heterozygous | *SCN5A* | 1160160 | A1673G | H558R | rs1805124 |
| 94 | 17 | Months | Undetermined | 21 | T | C | Heterozygous | *KCNE1* | 219 | A112G | S38G | rs1805127 |
| 31 | 13 | Months | Undetermined | 3 | T | C | Heterozygous | *SCN5A* | 1160160 | A1673G | H558R | rs1805124 |
| 31 | 13 | Months | Undetermined | 21 | T | C | Homozygous | *KCNE1* | 219 | A112G | S38G | rs1805127 |
| 31 | 13 | Months | Undetermined | 4 | C | A | Heterozygous | *ANK2* | 1148 | C11218A | L3740I (L1622I) | rs35530544 |
| 31 | 13 | Months | Undetermined | 3 | A | G | Homozygous | *SCN10A* | 6514 | T3218C | V1073A | rs6795970 |
| 247 | 14 | Months | Undetermined | 1 | G | A |  | *RYR2* | 1035 | G5656A | G1886S | rs3766871 |
| 247 | 14 | Months | Undetermined | 21 | T | C | Heterozygous | *KCNE1* | 219 | A112G | S38G | rs1805127 |
| 318 | 13 | Months | Undetermined | 3 | T | C | Heterozygous | *SCN5A* | 1160161 | A1673G | H558R | rs1805124 |
| 318 | 13 | Months | Undetermined | 21 | T | C | Homozygous | *KCNE1* | 219 | A112G | S38G | rs1805127 |
| 318 | 13 | Months | Undetermined | 3 | A | G | Homozygous | *SCN10A* | 6514 | T3218C | V1073A | rs6795970 |
| 324 | 15 | Months | Undetermined | 3 | T | C | Heterozygous | *SCN5A* | 198056 | A1673G | H558R | rs1805124 |
| 324 | 15 | Months | Undetermined | 21 | T | C | Heterozygous | *KCNE1* | 219 | A112G | S38G | rs1805127 |
| 324 | 15 | Months | Undetermined | 3 | A | G | Homozygous | *SCN10A* | 6514 | T3218C | V1073A | rs6795970 |
| 288 | 16 | Months | Undetermined | 21 | T | C | Homozygous | *KCNE1* | 219 | A112G | S38G | rs1805127 |
| 288 | 16 | Months | Undetermined | 11 | C | T | Heterozygous | *MYBPC3* | 256 | G1520A | G507R | rs35736435 |
| 192 | 17 | Months | Undetermined | 3 | G | A | Heterozygous | *SCN5A* | 198056 | C1441T | R481W | rs144511230 |
| 192 | 17 | Months | Undetermined | 3 | T | C | Heterozygous | *SCN5A* | 1160161 | A1673G | H558R | rs1805124 |
| 192 | 17 | Months | Undetermined | 21 | T | C | Homozygous | *KCNE1* | 219 | A112G | S38G | rs1805127 |
| 192 | 17 | Months | Undetermined | 11 | G | A | Heterozygous | *MYBPC3* | 256 | C2499T | A833V | RS3729952 |
| 192 | 17 | Months | Undetermined | 3 | A | G | Heterozygous | *SCN10A* | 6514 | T3218C | V1073A | rs6795970 |
| 297 | 20 | Months | Undetermined | 21 | T | C | Homozygous | *KCNE1* | 219 | A112G | S38G | rs1805127 |
| 297 | 20 | Months | Undetermined | 11 | C | T | Heterozygous | *MYBPC3* | 256 | G1520A | G507R | rs35736435 |
| 297 | 20 | Months | Undetermined | 3 | A | G | Heterozygous | *SCN10A* | 6514 | T3218C | V1073A | rs6795970 |
| 248 | 21 | Months | Undetermined | 4 | C | A | Heterozygous | *ANK2* | 20977 | C4976A | T1659N (T1626N) | rs121912705 |
| 248 | 21 | Months | Undetermined | 21 | T | C | Heterozygous | *KCNE1* | 219 | A112G | S38G | rs1805127 |
| 248 | 21 | Months | Undetermined | 11 | G | A | Heterozygous | *MYBPC3* | 256 | C2499T | A833V | RS3729952 |
| 248 | 21 | Months | Undetermined | 3 | A | G | Homozygous | *SCN10A* | 6514 | T3218C | V1073A | rs6795970 |
| 32 | 23 | Months | Undetermined | 7 | T | G | Heterozygous | *KCNH2* | 172057 | A1670C | K557T | rs1805123 |
| 32 | 23 | Months | Undetermined | 21 | T | C | Homozygous | *KCNE1* | 219 | A112G | S38G | rs1805127 |
