# Supplementary material for: Postmortem genetic screening for the identification, verification, and reporting of genetic variants contributing to the sudden death of the young
Source: HighWire-hosted journal article supplement (doi:10.1101/gr.195800.115), 2016-07-19
Supplement: Supplemental_Table__S3.doc.docx [file Supplemental_Table__S3.doc.docx]

**Supplemental Table 3. Sequencing Costs.**

Sequencing and data analysis costs based on a cohort of 351. The labor costs of work performed at the Human Genome Sequencing Center and Medical Genetics Laboratory is included in the total price per sample listed.

**Supplemental Table 3:** Sequencing Cost Estimates

| Item | **Description** | | **Price per samplea** |
| --- | --- | --- | --- |
| Extraction Reagents | QIAsymphony DSP Midi Kit | | $6.42 |
| NimbleGEN SeqCap Capture Array | Roche – Library Design and Probes | | $4.27 |
| Human Genome Sequencing Center  – Baylor College of Medicine | | Library Preparation  Target Capture  Illumina MiSeq Sequencing  Primary Data Analysis  Sequencing Center Labor | $341.63 |
| Medical Genetics Laboratories  – Baylor College of Medicine | Clinical verification of variantsb | | $21.65 |
| Post-doctoral Salary | Salary and Benefits (40 Hrs*52 Wks)c | | $194.13 |
| Total |  | | **$568.10** |

aNumber of samples successfully sequenced (*n*= 351)

bAnalysis and Sanger sequencing of 38 genetic variants at $200/sample

cOne post-doctoral researcher - assuming salary and benefits of $68,140 per year
